# Supplementary material
Source: publisher figshare collection journal article supplement (https://acs.figshare.com/ndownloader/files/5131768)
Supplement: Supplementary file 1 [file 5131768]

data_JA0438011Data9cif

_audit_creation_date                  'Wed Dec 19 16:20:05 2001'

_audit_creation_method                'by teXsan'

_audit_update_record                   ?

#------------------------------------------------------------------------------

# PROCESSING SUMMARY (IUCr Office Use Only) 

_journal_date_recd_electronic          ?

_journal_date_from_coeditor            ?

_journal_date_accepted                 ?

_journal_coeditor_code                 ?

#------------------------------------------------------------------------------

# SUBMISSION DETAILS 

_publ_contact_author_name             ' Yohsuke Yamamoto'

_publ_contact_author_address

;

    ENTER ADDRESS

;

_publ_contact_author_email            ' yyama@sci.hiroshima-u.ac.jp '

_publ_contact_author_fax              ' +81-824-24-0723 '

_publ_contact_author_phone            ' +81-824-24-7430 '

_publ_contact_letter

;

    ENTER TEXT OF LETTER

;

_publ_requested_journal               ' J. Am. Chem. Soc.'


_publ_requested_coeditor_name          ?

#------------------------------------------------------------------------------

data_OMe2OPOOEt2

#------------------------------------------------------------------------------

# CHEMICAL DATA 

_chemical_formula_sum                  'C20 H23 O6 P '

_chemical_formula_moiety               'C20 H23 O6 P '

_chemical_formula_weight               390.37

_chemical_melting_point                ?

#------------------------------------------------------------------------------

# CRYSTAL DATA 

_symmetry_cell_setting                 orthorhombic

_symmetry_space_group_name_H-M        'P 21 21 21   '

_symmetry_Int_Tables_number            19

loop_

_symmetry_equiv_pos_as_xyz

x,y,z

1/2-x,-y,1/2+z

1/2+x,1/2-y,-z

-x,1/2+y,1/2-z

_cell_length_a                         10.0330(2)

_cell_length_b                         11.9530(5)

_cell_length_c                         16.2950(7)

_cell_angle_alpha                      90

_cell_angle_beta                       90

_cell_angle_gamma                      90

_cell_volume                           1954.2(1)

_cell_formula_units_Z                  4

_cell_measurement_reflns_used          ?

_cell_measurement_theta_min            ?

_cell_measurement_theta_max            ?

_cell_measurement_temperature          273.2

#------------------------------------------------------------------------------

_exptl_crystal_description            'plate'

_exptl_crystal_colour                 'yellow'

_exptl_crystal_size_max                1.000

_exptl_crystal_size_mid                0.300

_exptl_crystal_size_min                0.300

_exptl_crystal_size_rad                ?

_exptl_crystal_density_diffrn          1.327

_exptl_crystal_density_meas            ?

_exptl_crystal_density_method         'not measured'

_exptl_absorpt_coefficient_mu          0.174

_exptl_absorpt_correction_type         none

#------------------------------------------------------------------------------

# EXPERIMENTAL DATA 

_diffrn_radiation_type                'Mo K\/Ya'

_diffrn_radiation_wavelength           0.7107

_diffrn_measurement_device_type       ?

_diffrn_reflns_number                  2578

_diffrn_reflns_av_R_equivalents        ?

_diffrn_reflns_theta_max               27.91

_diffrn_measured_fraction_theta_max    0.9714

_diffrn_reflns_theta_full              27.91

_diffrn_measured_fraction_theta_full   0.9714

_diffrn_reflns_limit_h_min             0

_diffrn_reflns_limit_h_max             12

_diffrn_reflns_limit_k_min             0

_diffrn_reflns_limit_k_max             15

_diffrn_reflns_limit_l_min             0

_diffrn_reflns_limit_l_max             21

#------------------------------------------------------------------------------

# REFINEMENT DATA 

_refine_special_details

;

Refinement using reflections with F^2^ > 5.0 sigma(F^2^). The weighted R-factor

(wR), goodness of fit (S) and R-factor (gt) are based on F, with F set to zero 

for negative F. The threshold expression of F^2^ > 5.0 sigma(F^2^) is used only 

for calculating R-factor (gt).

;

_reflns_number_total                   2578

_reflns_number_gt                      2122

_reflns_threshold_expression           F^2^>5.0\/Ys(F^2^)

_refine_ls_structure_factor_coef       F

_refine_ls_R_factor_gt                 0.0514

_refine_ls_wR_factor_ref               0.0742

_refine_ls_hydrogen_treatment          noref

_refine_ls_number_reflns               2122

_refine_ls_number_parameters           245

_refine_ls_goodness_of_fit_ref         1.000

_refine_ls_weighting_scheme            calc

_refine_ls_weighting_details

   'w = 1/[\/Ys^2^(Fo) + 0.00555|Fo|^2^]'

_refine_ls_shift/su_max                0.1227

_refine_diff_density_max               0.19

_refine_diff_density_min               -0.31

_refine_ls_extinction_method           none

_refine_ls_extinction_coef             ?

_refine_ls_abs_structure_details       ?

_refine_ls_abs_structure_Flack         0.8(2)

loop_

_atom_type_symbol

_atom_type_description

_atom_type_scat_dispersion_real

_atom_type_scat_dispersion_imag

_atom_type_scat_source

  'C' 'C'  0.003 0.002 

;International Tables for Crystallography

(1992, Vol. C, Tables 4.2.6.8 and 6.1.1.1)

;

  'H' 'H'  0.000 0.000 

;International Tables for Crystallography

(1992, Vol. C, Table 6.1.1.2)

;

  'O' 'O'  0.011 0.006 

;International Tables for Crystallography

(1992, Vol. C, Tables 4.2.6.8 and 6.1.1.1)

;

  'P' 'P'  0.102 0.094 

;International Tables for Crystallography

(1992, Vol. C, Tables 4.2.6.8 and 6.1.1.1)

;

#------------------------------------------------------------------------------

# ATOMIC COORDINATES AND DISPLACEMENT PARAMETERS 

loop_

_atom_site_label

_atom_site_type_symbol

_atom_site_fract_x

_atom_site_fract_y

_atom_site_fract_z

_atom_site_U_iso_or_equiv

_atom_site_adp_type

_atom_site_occupancy

_atom_site_calc_flag

_atom_site_refinement_flags

_atom_site_disorder_assembly

_atom_site_disorder_group

 P(1)   P  0.40541(7)  0.24808(6)  0.67826(4)  0.0495(2)   Uani 1.00 d . . .

 O(1)   O  0.1250(2)   0.2624(2)   0.6121(1)   0.0627(6)   Uani 1.00 d . . .

 O(2)   O  0.3598(2)   0.3287(2)   0.8808(1)   0.0663(6)   Uani 1.00 d . . .

 O(3)   O  0.2830(2)   0.2751(1)   0.7362(1)   0.0442(4)   Uani 1.00 d . . .

 O(4)   O  0.4000(3)   0.1451(2)   0.6319(1)   0.0668(6)   Uani 1.00 d . . .

 O(5)   O  0.4135(3)   0.3522(2)   0.6212(1)   0.0654(6)   Uani 1.00 d . . .

 O(6)   O  0.5250(2)   0.2601(3)   0.7400(1)   0.0683(7)   Uani 1.00 d . . .

 C(1)   C  0.0648(3)   0.1712(3)   0.6451(2)   0.0565(7)   Uani 1.00 d . . .

 C(2)   C  -0.0343(4)  0.1131(4)   0.6056(3)   0.078(1)    Uani 1.00 d . . .

 C(3)   C  -0.0979(4)  0.0217(4)   0.6431(3)   0.093(1)    Uani 1.00 d . . .

 C(4)   C  -0.0651(4)  -0.0096(3)  0.7185(4)   0.086(1)    Uani 1.00 d . . .

 C(5)   C  0.2123(4)   0.0265(4)   0.9677(2)   0.084(1)    Uani 1.00 d . . .

 C(6)   C  0.3018(5)   0.0823(5)   1.0116(2)   0.091(1)    Uani 1.00 d . . .

 C(7)   C  0.3555(4)   0.1851(5)   0.9847(2)   0.082(1)    Uani 1.00 d . . .

 C(8)   C  0.3215(3)   0.2271(3)   0.9087(2)   0.0581(7)   Uani 1.00 d . . .

 C(9)   C  0.2068(2)   0.1916(2)   0.7731(2)   0.0436(5)   Uani 1.00 d . . .

 C(10)  C  0.0758(4)   0.0115(3)   0.8416(3)   0.0718(9)   Uani 1.00 d . . .

 C(11)  C  0.1059(3)   0.1398(2)   0.7270(2)   0.0503(6)   Uani 1.00 d . . .

 C(12)  C  0.0376(3)   0.0471(3)   0.7643(2)   0.0639(8)   Uani 1.00 d . . .

 C(13)  C  0.1713(3)   0.0658(3)   0.8881(2)   0.0641(8)   Uani 1.00 d . . .

 C(14)  C  0.2352(3)   0.1643(2)   0.8552(2)   0.0517(6)   Uani 1.00 d . . .

 C(15)  C  0.1138(5)   0.2797(4)   0.5261(2)   0.085(1)    Uani 1.00 d . . .

 C(16)  C  0.4591(4)   0.3881(5)   0.9258(3)   0.093(1)    Uani 1.00 d . . .

 C(17)  C  0.4285(5)   0.4659(4)   0.6531(3)   0.093(1)    Uani 1.00 d . . .

 C(18)  C  0.3501(7)   0.5430(5)   0.6017(3)   0.113(2)    Uani 1.00 d . . .

 C(19)  C  0.6607(4)   0.2459(6)   0.7109(3)   0.098(1)    Uani 1.00 d . . .

 C(20)  C  0.7537(4)   0.2953(5)   0.7696(3)   0.100(2)    Uani 1.00 d . . .

 H(1)   H  -0.0595     0.1358      0.5519      0.0951      Uiso 1.00 calc . . .

 H(2)   H  -0.1656     -0.0172     0.6140      0.1107      Uiso 1.00 calc . . .

 H(3)   H  -0.1117     -0.0706     0.7426      0.1021      Uiso 1.00 calc . . .

 H(4)   H  0.1753      -0.0410     0.9888      0.1020      Uiso 1.00 calc . . .

 H(5)   H  0.3293      0.0516      1.0624      0.1107      Uiso 1.00 calc . . .

 H(6)   H  0.4154      0.2259      1.0191      0.0994      Uiso 1.00 calc . . .

 H(7)   H  0.0346      -0.0530     0.8648      0.0869      Uiso 1.00 calc . . .

 H(8)   H  0.1625      0.3466      0.5115      0.1022      Uiso 1.00 calc . . .

 H(9)   H  0.1546      0.2183      0.4978      0.1022      Uiso 1.00 calc . . .

 H(10)  H  0.0251      0.2871      0.5104      0.1022      Uiso 1.00 calc . . .

 H(11)  H  0.5381      0.3450      0.9280      0.1116      Uiso 1.00 calc . . .

 H(12)  H  0.4760      0.4576      0.9002      0.1116      Uiso 1.00 calc . . .

 H(13)  H  0.4272      0.4007      0.9803      0.1116      Uiso 1.00 calc . . .

 H(14)  H  0.3943      0.4690      0.7079      0.1122      Uiso 1.00 calc . . .

 H(15)  H  0.5186      0.4868      0.6529      0.1122      Uiso 1.00 calc . . .

 H(16)  H  0.3586      0.6173      0.6213      0.1344      Uiso 1.00 calc . . .

 H(17)  H  0.3834      0.5401      0.5463      0.1344      Uiso 1.00 calc . . .

 H(18)  H  0.2589      0.5219      0.6012      0.1344      Uiso 1.00 calc . . .

 H(19)  H  0.6803      0.1674      0.7065      0.1184      Uiso 1.00 calc . . .

 H(20)  H  0.6716      0.2798      0.6592      0.1184      Uiso 1.00 calc . . .

 H(21)  H  0.7429      0.2611      0.8220      0.1192      Uiso 1.00 calc . . .

 H(22)  H  0.8422      0.2865      0.7514      0.1192      Uiso 1.00 calc . . .

 H(23)  H  0.7339      0.3736      0.7748      0.1192      Uiso 1.00 calc . . .


loop_

_atom_site_aniso_label

_atom_site_aniso_U_11

_atom_site_aniso_U_22

_atom_site_aniso_U_33

_atom_site_aniso_U_12

_atom_site_aniso_U_13

_atom_site_aniso_U_23

 P(1)   0.0501(4)   0.0532(4)   0.0453(3)   -0.0031(3)  0.0082(2)   -0.0035(3) 

 O(1)   0.073(1)    0.066(1)    0.0498(10)  0.0009(10)  -0.0141(9)  -0.0029(9) 

 O(2)   0.062(1)    0.079(1)    0.059(1)    -0.005(1)   -0.0082(10) -0.012(1)  

 O(3)   0.0446(8)   0.0418(9)   0.0461(8)   -0.0037(6)  0.0031(6)   -0.0020(7) 

 O(4)   0.075(1)    0.058(1)    0.067(1)    0.001(1)    0.015(1)    -0.0158(10)

 O(5)   0.084(1)    0.061(1)    0.051(1)    -0.013(1)   0.015(1)    0.0019(8)  

 O(6)   0.046(1)    0.101(2)    0.057(1)    -0.003(1)   0.0053(7)   -0.007(1)  

 C(1)   0.048(1)    0.059(1)    0.063(1)    0.0036(10)  -0.003(1)   -0.019(1)  

 C(2)   0.057(2)    0.094(2)    0.083(2)    -0.002(1)   -0.012(2)   -0.039(2)  

 C(3)   0.054(2)    0.098(3)    0.127(3)    -0.019(2)   0.000(2)    -0.044(2)  

 C(4)   0.058(2)    0.068(2)    0.131(3)    -0.023(2)   0.018(2)    -0.025(2)  

 C(5)   0.103(3)    0.079(2)    0.069(2)    0.037(2)    0.035(2)    0.031(2)   

 C(6)   0.104(3)    0.113(3)    0.057(2)    0.049(2)    0.011(2)    0.027(2)   

 C(7)   0.080(2)    0.119(3)    0.048(1)    0.032(2)    0.002(1)    0.007(2)   

 C(8)   0.052(1)    0.076(2)    0.046(1)    0.016(1)    0.0005(9)   -0.003(1)  

 C(9)   0.042(1)    0.040(1)    0.049(1)    0.0017(8)   0.0053(9)   -0.0004(9) 

 C(10)  0.070(2)    0.052(2)    0.094(2)    -0.003(1)   0.032(1)    0.006(1)   

 C(11)  0.042(1)    0.046(1)    0.063(1)    -0.0011(9)  0.0064(9)   -0.009(1)  

 C(12)  0.052(2)    0.049(1)    0.090(2)    -0.005(1)   0.022(1)    -0.007(1)  

 C(13)  0.067(2)    0.058(2)    0.068(1)    0.016(1)    0.027(1)    0.014(1)   

 C(14)  0.047(1)    0.055(1)    0.053(1)    0.0124(9)   0.0087(9)   0.005(1)   

 C(15)  0.112(3)    0.091(3)    0.051(1)    0.013(2)    -0.017(2)   -0.005(2)  

 C(16)  0.072(2)    0.121(4)    0.087(3)    -0.016(2)   -0.017(2)   -0.042(3)  

 C(17)  0.123(3)    0.061(2)    0.096(3)    -0.022(2)   0.015(3)    -0.007(2)  

 C(18)  0.153(5)    0.071(3)    0.115(4)    0.014(3)    0.017(4)    0.006(3)   

 C(19)  0.050(2)    0.162(5)    0.082(2)    0.013(2)    0.013(1)    -0.014(3)  

 C(20)  0.052(2)    0.137(4)    0.110(3)    -0.020(2)   -0.002(2)   0.024(3)   

#------------------------------------------------------------------------------

_computing_data_collection            '.'

_computing_cell_refinement            '.'

_computing_data_reduction             'teXsan Ver. 1.11'

_computing_structure_solution          SIR92

_computing_structure_refinement       'teXsan Ver. 1.10'

_computing_publication_material       'teXsan Ver. 1.11'

_computing_molecular_graphics          ?

#------------------------------------------------------------------------------

_geom_special_details

;

 ?

;

loop_

_geom_bond_atom_site_label_1

_geom_bond_atom_site_label_2

_geom_bond_distance

_geom_bond_site_symmetry_1

_geom_bond_site_symmetry_2

_geom_bond_publ_flag

 P(1)      O(3)      1.582(2)   . . yes

 P(1)      O(4)      1.446(2)   . . yes

 P(1)      O(5)      1.555(2)   . . yes

 P(1)      O(6)      1.572(2)   . . yes

 P(1)      C(9)      2.611(3)   . . yes

 P(1)      C(17)     2.646(4)   . . yes

 P(1)      C(19)     2.616(4)   . . yes

 O(1)      O(3)      2.574(3)   . . yes

 O(1)      C(1)      1.356(4)   . . yes

 O(1)      C(2)      2.397(5)   . . yes

 O(1)      C(11)     2.385(4)   . . yes

 O(1)      C(15)     1.421(4)   . . yes

 O(2)      O(3)      2.561(3)   . . yes

 O(2)      C(7)      2.411(5)   . . yes

 O(2)      C(8)      1.353(4)   . . yes

 O(2)      C(14)     2.366(4)   . . yes

 O(2)      C(16)     1.427(4)   . . yes

 O(3)      O(4)      2.584(3)   . . yes

 O(3)      O(5)      2.464(3)   . . yes

 O(3)      O(6)      2.435(3)   . . yes

 O(3)      C(9)      1.394(3)   . . yes

 O(3)      C(11)     2.407(3)   . . yes

 O(3)      C(14)     2.397(3)   . . yes

 O(4)      O(5)      2.485(3)   . . yes

 O(4)      O(6)      2.562(3)   . . yes

 O(5)      O(6)      2.492(4)   . . yes

 O(5)      C(17)     1.463(5)   . . yes

 O(5)      C(18)     2.390(6)   . . yes

 O(6)      C(19)     1.452(4)   . . yes

 O(6)      C(20)     2.382(4)   . . yes

 C(1)      C(2)      1.373(4)   . . yes

 C(1)      C(3)      2.420(5)   . . yes

 C(1)      C(9)      2.538(4)   . . yes

 C(1)      C(11)     1.447(4)   . . yes

 C(1)      C(12)     2.460(5)   . . yes

 C(1)      C(15)     2.384(6)   . . yes

 C(2)      C(3)      1.405(7)   . . yes

 C(2)      C(4)      2.374(7)   . . yes

 C(2)      C(11)     2.449(4)   . . yes

 C(3)      C(4)      1.326(7)   . . yes

 C(3)      C(12)     2.416(6)   . . yes

 C(4)      C(10)     2.466(7)   . . yes

 C(4)      C(11)     2.481(4)   . . yes

 C(4)      C(12)     1.442(5)   . . yes

 C(5)      C(6)      1.327(7)   . . yes

 C(5)      C(7)      2.395(8)   . . yes

 C(5)      C(10)     2.476(6)   . . yes

 C(5)      C(13)     1.440(5)   . . yes

 C(5)      C(14)     2.476(4)   . . yes

 C(6)      C(7)      1.412(8)   . . yes

 C(6)      C(8)      2.419(5)   . . yes

 C(6)      C(13)     2.409(6)   . . yes

 C(7)      C(8)      1.379(4)   . . yes

 C(7)      C(14)     2.443(5)   . . yes

 C(8)      C(9)      2.526(4)   . . yes

 C(8)      C(13)     2.469(5)   . . yes

 C(8)      C(14)     1.439(4)   . . yes

 C(8)      C(16)     2.386(6)   . . yes

 C(9)      C(11)     1.404(4)   . . yes

 C(9)      C(12)     2.426(4)   . . yes

 C(9)      C(13)     2.428(4)   . . yes

 C(9)      C(14)     1.406(4)   . . yes

 C(10)     C(11)     2.435(4)   . . yes

 C(10)     C(12)     1.383(6)   . . yes

 C(10)     C(13)     1.384(6)   . . yes

 C(10)     C(14)     2.438(5)   . . yes

 C(11)     C(12)     1.438(4)   . . yes

 C(11)     C(14)     2.476(4)   . . yes

 C(12)     C(13)     2.433(6)   . . yes

 C(13)     C(14)     1.444(4)   . . yes

 C(17)     C(18)     1.474(8)   . . yes

 C(19)     C(20)     1.461(7)   . . yes

#------------------------------------------------------------------------------

loop_

_geom_angle_atom_site_label_1

_geom_angle_atom_site_label_2

_geom_angle_atom_site_label_3

_geom_angle

_geom_angle_site_symmetry_1

_geom_angle_site_symmetry_2

_geom_angle_site_symmetry_3

_geom_angle_publ_flag

   O(3)      P(1)      O(4)      117.1(1)   . . . yes

   O(3)      P(1)      O(5)      103.5(1)   . . . yes

   O(3)      P(1)      O(6)      101.1(1)   . . . yes

   O(3)      P(1)      C(9)      26.76(8)   . . . yes

   O(3)      P(1)      C(17)     87.7(1)    . . . yes

   O(3)      P(1)      C(19)     129.9(1)   . . . yes

   O(4)      P(1)      O(5)      111.8(1)   . . . yes

   O(4)      P(1)      O(6)      116.2(2)   . . . yes

   O(4)      P(1)      C(9)      93.5(1)    . . . yes

   O(4)      P(1)      C(17)     139.5(1)   . . . yes

   O(4)      P(1)      C(19)     97.7(2)    . . . yes

   O(5)      P(1)      O(6)      105.6(1)   . . . yes

   O(5)      P(1)      C(9)      126.9(1)   . . . yes

   O(5)      P(1)      C(17)     27.8(1)    . . . yes

   O(5)      P(1)      C(19)     94.5(2)    . . . yes

   O(6)      P(1)      C(9)      103.1(1)   . . . yes

   O(6)      P(1)      C(17)     86.7(2)    . . . yes

   O(6)      P(1)      C(19)     28.8(1)    . . . yes

   C(9)      P(1)      C(17)     114.4(1)   . . . yes

   C(9)      P(1)      C(19)     128.6(1)   . . . yes

   C(17)     P(1)      C(19)     87.5(2)    . . . yes

   O(3)      O(1)      C(1)      90.6(2)    . . . yes

   O(3)      O(1)      C(2)      119.3(1)   . . . yes

   O(3)      O(1)      C(11)     57.93(9)   . . . yes

   O(3)      O(1)      C(15)     144.5(3)   . . . yes

   C(1)      O(1)      C(2)      28.8(2)    . . . yes

   C(1)      O(1)      C(11)     32.9(2)    . . . yes

   C(1)      O(1)      C(15)     118.2(3)   . . . yes

   C(2)      O(1)      C(11)     61.6(1)    . . . yes

   C(2)      O(1)      C(15)     90.7(3)    . . . yes

   C(11)     O(1)      C(15)     149.0(3)   . . . yes

   O(3)      O(2)      C(7)      117.5(2)   . . . yes

   O(3)      O(2)      C(8)      89.9(2)    . . . yes

   O(3)      O(2)      C(14)     58.07(9)   . . . yes

   O(3)      O(2)      C(16)     143.9(3)   . . . yes

   C(7)      O(2)      C(8)      28.3(2)    . . . yes

   C(7)      O(2)      C(14)     61.5(1)    . . . yes

   C(7)      O(2)      C(16)     90.3(3)    . . . yes

   C(8)      O(2)      C(14)     33.2(2)    . . . yes

   C(8)      O(2)      C(16)     118.2(3)   . . . yes

   C(14)     O(2)      C(16)     150.8(3)   . . . yes

   P(1)      O(3)      O(1)      89.89(9)   . . . yes

   P(1)      O(3)      O(2)      111.5(1)   . . . yes

   P(1)      O(3)      O(4)      29.86(7)   . . . yes

   P(1)      O(3)      O(5)      37.86(8)   . . . yes

   P(1)      O(3)      O(6)      39.32(7)   . . . yes

   P(1)      O(3)      C(9)      122.5(2)   . . . yes

   P(1)      O(3)      C(11)     113.6(1)   . . . yes

   P(1)      O(3)      C(14)     121.7(1)   . . . yes

   O(1)      O(3)      O(2)      157.3(1)   . . . yes

   O(1)      O(3)      O(4)      74.21(9)   . . . yes

   O(1)      O(3)      O(5)      75.67(10)  . . . yes

   O(1)      O(3)      O(6)      129.1(1)   . . . yes

   O(1)      O(3)      C(9)      87.6(1)    . . . yes

   O(1)      O(3)      C(11)     57.1(1)    . . . yes

   O(1)      O(3)      C(14)     118.7(1)   . . . yes

   O(2)      O(3)      O(4)      128.3(1)   . . . yes

   O(2)      O(3)      O(5)      116.5(1)   . . . yes

   O(2)      O(3)      O(6)      72.25(9)   . . . yes

   O(2)      O(3)      C(9)      86.9(2)    . . . yes

   O(2)      O(3)      C(11)     116.5(1)   . . . yes

   O(2)      O(3)      C(14)     56.9(1)    . . . yes

   O(4)      O(3)      O(5)      58.93(9)   . . . yes

   O(4)      O(3)      O(6)      61.32(9)   . . . yes

   O(4)      O(3)      C(9)      95.9(1)    . . . yes

   O(4)      O(3)      C(11)     83.75(10)  . . . yes

   O(4)      O(3)      C(14)     106.9(1)   . . . yes

   O(5)      O(3)      O(6)      61.15(10)  . . . yes

   O(5)      O(3)      C(9)      152.6(2)   . . . yes

   O(5)      O(3)      C(11)     126.6(1)   . . . yes

   O(5)      O(3)      C(14)     158.2(1)   . . . yes

   O(6)      O(3)      C(9)      118.9(2)   . . . yes

   O(6)      O(3)      C(11)     133.5(1)   . . . yes

   O(6)      O(3)      C(14)     97.9(1)    . . . yes

   C(9)      O(3)      C(11)     30.8(1)    . . . yes

   C(9)      O(3)      C(14)     31.3(1)    . . . yes

   C(11)     O(3)      C(14)     62.1(1)    . . . yes

   P(1)      O(4)      O(3)      33.00(7)   . . . yes

   P(1)      O(4)      O(5)      35.54(8)   . . . yes

   P(1)      O(4)      O(6)      33.41(9)   . . . yes

   O(3)      O(4)      O(5)      58.12(8)   . . . yes

   O(3)      O(4)      O(6)      56.47(8)   . . . yes

   O(5)      O(4)      O(6)      59.1(1)    . . . yes

   P(1)      O(5)      O(3)      38.62(7)   . . . yes

   P(1)      O(5)      O(4)      32.70(8)   . . . yes

   P(1)      O(5)      O(6)      37.41(9)   . . . yes

   P(1)      O(5)      C(17)     122.4(2)   . . . yes

   P(1)      O(5)      C(18)     146.1(2)   . . . yes

   O(3)      O(5)      O(4)      62.95(9)   . . . yes

   O(3)      O(5)      O(6)      58.85(8)   . . . yes

   O(3)      O(5)      C(17)     97.6(2)    . . . yes

   O(3)      O(5)      C(18)     108.5(2)   . . . yes

   O(4)      O(5)      O(6)      62.0(1)    . . . yes

   O(4)      O(5)      C(17)     155.0(3)   . . . yes

   O(4)      O(5)      C(18)     161.0(2)   . . . yes

   O(6)      O(5)      C(17)     95.1(3)    . . . yes

   O(6)      O(5)      C(18)     130.2(2)   . . . yes

   C(17)     O(5)      C(18)     35.7(3)    . . . yes

   P(1)      O(6)      O(3)      39.60(6)   . . . yes

   P(1)      O(6)      O(4)      30.42(8)   . . . yes

   P(1)      O(6)      O(5)      36.94(9)   . . . yes

   P(1)      O(6)      C(19)     119.7(2)   . . . yes

   P(1)      O(6)      C(20)     151.7(2)   . . . yes

   O(3)      O(6)      O(4)      62.21(9)   . . . yes

   O(3)      O(6)      O(5)      60.00(9)   . . . yes

   O(3)      O(6)      C(19)     159.3(2)   . . . yes

   O(3)      O(6)      C(20)     162.3(2)   . . . yes

   O(4)      O(6)      O(5)      58.88(9)   . . . yes

   O(4)      O(6)      C(19)     99.9(3)    . . . yes

   O(4)      O(6)      C(20)     134.9(2)   . . . yes

   O(5)      O(6)      C(19)     102.7(2)   . . . yes

   O(5)      O(6)      C(20)     120.8(2)   . . . yes

   C(19)     O(6)      C(20)     35.3(3)    . . . yes

   O(1)      C(1)      C(2)      122.9(3)   . . . yes

   O(1)      C(1)      C(3)      152.6(3)   . . . yes

   O(1)      C(1)      C(9)      89.9(2)    . . . yes

   O(1)      C(1)      C(11)     116.6(2)   . . . yes

   O(1)      C(1)      C(12)     147.9(2)   . . . yes

   O(1)      C(1)      C(15)     31.7(2)    . . . yes

   C(2)      C(1)      C(3)      29.8(3)    . . . yes

   C(2)      C(1)      C(9)      147.2(3)   . . . yes

   C(2)      C(1)      C(11)     120.5(3)   . . . yes

   C(2)      C(1)      C(12)     89.1(3)    . . . yes

   C(2)      C(1)      C(15)     92.5(3)    . . . yes

   C(3)      C(1)      C(9)      117.4(2)   . . . yes

   C(3)      C(1)      C(11)     90.7(2)    . . . yes

   C(3)      C(1)      C(12)     59.4(2)    . . . yes

   C(3)      C(1)      C(15)     122.0(2)   . . . yes

   C(9)      C(1)      C(11)     26.7(1)    . . . yes

   C(9)      C(1)      C(12)     58.0(1)    . . . yes

   C(9)      C(1)      C(15)     120.0(2)   . . . yes

   C(11)     C(1)      C(12)     31.4(2)    . . . yes

   C(11)     C(1)      C(15)     146.4(2)   . . . yes

   C(12)     C(1)      C(15)     173.4(2)   . . . yes

   O(1)      C(2)      C(1)      28.4(2)    . . . yes

   O(1)      C(2)      C(3)      149.5(3)   . . . yes

   O(1)      C(2)      C(4)      120.8(2)   . . . yes

   O(1)      C(2)      C(11)     58.9(1)    . . . yes

   C(1)      C(2)      C(3)      121.2(4)   . . . yes

   C(1)      C(2)      C(4)      92.5(3)    . . . yes

   C(1)      C(2)      C(11)     30.6(2)    . . . yes

   C(3)      C(2)      C(4)      28.7(2)    . . . yes

   C(3)      C(2)      C(11)     90.6(3)    . . . yes

   C(4)      C(2)      C(11)     61.9(2)    . . . yes

   C(1)      C(3)      C(2)      29.0(2)    . . . yes

   C(1)      C(3)      C(4)      91.7(3)    . . . yes

   C(1)      C(3)      C(12)     61.1(1)    . . . yes

   C(2)      C(3)      C(4)      120.7(4)   . . . yes

   C(2)      C(3)      C(12)     90.2(2)    . . . yes

   C(4)      C(3)      C(12)     30.5(2)    . . . yes

   C(2)      C(4)      C(3)      30.6(2)    . . . yes

   C(2)      C(4)      C(10)     119.5(2)   . . . yes

   C(2)      C(4)      C(11)     60.5(1)    . . . yes

   C(2)      C(4)      C(12)     91.0(3)    . . . yes

   C(3)      C(4)      C(10)     150.1(3)   . . . yes

   C(3)      C(4)      C(11)     91.1(3)    . . . yes

   C(3)      C(4)      C(12)     121.6(4)   . . . yes

   C(10)     C(4)      C(11)     59.0(1)    . . . yes

   C(10)     C(4)      C(12)     28.5(2)    . . . yes

   C(11)     C(4)      C(12)     30.5(2)    . . . yes

   C(6)      C(5)      C(7)      30.1(2)    . . . yes

   C(6)      C(5)      C(10)     149.0(3)   . . . yes

   C(6)      C(5)      C(13)     121.0(4)   . . . yes

   C(6)      C(5)      C(14)     90.1(3)    . . . yes

   C(7)      C(5)      C(10)     119.0(2)   . . . yes

   C(7)      C(5)      C(13)     91.0(3)    . . . yes

   C(7)      C(5)      C(14)     60.2(1)    . . . yes

   C(10)     C(5)      C(13)     28.1(2)    . . . yes

   C(10)     C(5)      C(14)     59.0(1)    . . . yes

   C(13)     C(5)      C(14)     30.9(2)    . . . yes

   C(5)      C(6)      C(7)      121.9(4)   . . . yes

   C(5)      C(6)      C(8)      92.4(2)    . . . yes

   C(5)      C(6)      C(13)     30.8(2)    . . . yes

   C(7)      C(6)      C(8)      29.6(2)    . . . yes

   C(7)      C(6)      C(13)     91.1(3)    . . . yes

   C(8)      C(6)      C(13)     61.5(1)    . . . yes

   O(2)      C(7)      C(5)      119.6(2)   . . . yes

   O(2)      C(7)      C(6)      147.7(3)   . . . yes

   O(2)      C(7)      C(8)      27.7(2)    . . . yes

   O(2)      C(7)      C(14)     58.3(1)    . . . yes

   C(5)      C(7)      C(6)      28.1(2)    . . . yes

   C(5)      C(7)      C(8)      92.1(3)    . . . yes

   C(5)      C(7)      C(14)     61.6(2)    . . . yes

   C(6)      C(7)      C(8)      120.1(4)   . . . yes

   C(6)      C(7)      C(14)     89.5(3)    . . . yes

   C(8)      C(7)      C(14)     30.6(2)    . . . yes

   O(2)      C(8)      C(6)      154.0(3)   . . . yes

   O(2)      C(8)      C(7)      123.9(4)   . . . yes

   O(2)      C(8)      C(9)      89.2(2)    . . . yes

   O(2)      C(8)      C(13)     146.0(2)   . . . yes

   O(2)      C(8)      C(14)     115.8(2)   . . . yes

   O(2)      C(8)      C(16)     31.8(2)    . . . yes

   C(6)      C(8)      C(7)      30.3(3)    . . . yes

   C(6)      C(8)      C(9)      116.7(2)   . . . yes

   C(6)      C(8)      C(13)     59.0(2)    . . . yes

   C(6)      C(8)      C(14)     89.9(3)    . . . yes

   C(6)      C(8)      C(16)     122.9(2)   . . . yes

   C(7)      C(8)      C(9)      146.8(3)   . . . yes

   C(7)      C(8)      C(13)     89.4(3)    . . . yes

   C(7)      C(8)      C(14)     120.2(4)   . . . yes

   C(7)      C(8)      C(16)     92.6(3)    . . . yes

   C(9)      C(8)      C(13)     58.2(1)    . . . yes

   C(9)      C(8)      C(14)     27.0(1)    . . . yes

   C(9)      C(8)      C(16)     120.1(2)   . . . yes

   C(13)     C(8)      C(14)     31.1(2)    . . . yes

   C(13)     C(8)      C(16)     177.4(2)   . . . yes

   C(14)     C(8)      C(16)     147.1(2)   . . . yes

   P(1)      C(9)      O(3)      30.71(10)  . . . yes

   P(1)      C(9)      C(1)      88.1(1)    . . . yes

   P(1)      C(9)      C(8)      97.3(1)    . . . yes

   P(1)      C(9)      C(11)     110.4(2)   . . . yes

   P(1)      C(9)      C(12)     133.1(1)   . . . yes

   P(1)      C(9)      C(13)     136.8(1)   . . . yes

   P(1)      C(9)      C(14)     117.9(2)   . . . yes

   O(3)      C(9)      C(1)      91.2(2)    . . . yes

   O(3)      C(9)      C(8)      90.4(2)    . . . yes

   O(3)      C(9)      C(11)     118.7(2)   . . . yes

   O(3)      C(9)      C(12)     150.2(2)   . . . yes

   O(3)      C(9)      C(13)     149.0(2)   . . . yes

   O(3)      C(9)      C(14)     117.7(2)   . . . yes

   C(1)      C(9)      C(8)      172.1(1)   . . . yes

   C(1)      C(9)      C(11)     27.6(2)    . . . yes

   C(1)      C(9)      C(12)     59.4(1)    . . . yes

   C(1)      C(9)      C(13)     119.5(2)   . . . yes

   C(1)      C(9)      C(14)     150.9(2)   . . . yes

   C(8)      C(9)      C(11)     150.4(2)   . . . yes

   C(8)      C(9)      C(12)     119.3(2)   . . . yes

   C(8)      C(9)      C(13)     59.7(1)    . . . yes

   C(8)      C(9)      C(14)     27.7(2)    . . . yes

   C(11)     C(9)      C(12)     31.8(2)    . . . yes

   C(11)     C(9)      C(13)     92.0(2)    . . . yes

   C(11)     C(9)      C(14)     123.6(2)   . . . yes

   C(12)     C(9)      C(13)     60.2(1)    . . . yes

   C(12)     C(9)      C(14)     91.9(2)    . . . yes

   C(13)     C(9)      C(14)     32.0(2)    . . . yes

   C(4)      C(10)     C(5)      177.7(2)   . . . yes

   C(4)      C(10)     C(11)     60.8(2)    . . . yes

   C(4)      C(10)     C(12)     29.9(2)    . . . yes

   C(4)      C(10)     C(13)     152.9(3)   . . . yes

   C(4)      C(10)     C(14)     121.8(2)   . . . yes

   C(5)      C(10)     C(11)     121.5(2)   . . . yes

   C(5)      C(10)     C(12)     152.4(3)   . . . yes

   C(5)      C(10)     C(13)     29.4(2)    . . . yes

   C(5)      C(10)     C(14)     60.5(2)    . . . yes

   C(11)     C(10)     C(12)     31.0(2)    . . . yes

   C(11)     C(10)     C(13)     92.2(2)    . . . yes

   C(11)     C(10)     C(14)     61.1(1)    . . . yes

   C(12)     C(10)     C(13)     123.1(3)   . . . yes

   C(12)     C(10)     C(14)     91.9(2)    . . . yes

   C(13)     C(10)     C(14)     31.1(2)    . . . yes

   O(1)      C(11)     O(3)      64.97(10)  . . . yes

   O(1)      C(11)     C(1)      30.6(1)    . . . yes

   O(1)      C(11)     C(2)      59.4(1)    . . . yes

   O(1)      C(11)     C(4)      117.0(2)   . . . yes

   O(1)      C(11)     C(9)      95.3(2)    . . . yes

   O(1)      C(11)     C(10)     177.1(2)   . . . yes

   O(1)      C(11)     C(12)     147.5(2)   . . . yes

   O(1)      C(11)     C(14)     123.2(1)   . . . yes

   O(3)      C(11)     C(1)      95.3(2)    . . . yes

   O(3)      C(11)     C(2)      124.2(2)   . . . yes

   O(3)      C(11)     C(4)      176.1(2)   . . . yes

   O(3)      C(11)     C(9)      30.5(1)    . . . yes

   O(3)      C(11)     C(10)     117.9(2)   . . . yes

   O(3)      C(11)     C(12)     147.5(2)   . . . yes

   O(3)      C(11)     C(14)     58.8(1)    . . . yes

   C(1)      C(11)     C(2)      28.9(2)    . . . yes

   C(1)      C(11)     C(4)      86.5(2)    . . . yes

   C(1)      C(11)     C(9)      125.8(3)   . . . yes

   C(1)      C(11)     C(10)     146.7(2)   . . . yes

   C(1)      C(11)     C(12)     117.0(3)   . . . yes

   C(1)      C(11)     C(14)     153.8(2)   . . . yes

   C(2)      C(11)     C(4)      57.6(2)    . . . yes

   C(2)      C(11)     C(9)      154.7(2)   . . . yes

   C(2)      C(11)     C(10)     117.8(2)   . . . yes

   C(2)      C(11)     C(12)     88.1(2)    . . . yes

   C(2)      C(11)     C(14)     176.4(2)   . . . yes

   C(4)      C(11)     C(9)      147.8(2)   . . . yes

   C(4)      C(11)     C(10)     60.2(2)    . . . yes

   C(4)      C(11)     C(12)     30.6(2)    . . . yes

   C(4)      C(11)     C(14)     119.6(2)   . . . yes

   C(9)      C(11)     C(10)     87.5(2)    . . . yes

   C(9)      C(11)     C(12)     117.2(3)   . . . yes

   C(9)      C(11)     C(14)     28.2(1)    . . . yes

   C(10)     C(11)     C(12)     29.7(2)    . . . yes

   C(10)     C(11)     C(14)     59.5(1)    . . . yes

   C(12)     C(11)     C(14)     89.1(2)    . . . yes

   C(1)      C(12)     C(3)      59.5(2)    . . . yes

   C(1)      C(12)     C(4)      87.4(3)    . . . yes

   C(1)      C(12)     C(9)      62.6(1)    . . . yes

   C(1)      C(12)     C(10)     150.9(3)   . . . yes

   C(1)      C(12)     C(11)     31.6(2)    . . . yes

   C(1)      C(12)     C(13)     122.6(2)   . . . yes

   C(3)      C(12)     C(4)      27.9(3)    . . . yes

   C(3)      C(12)     C(9)      122.1(2)   . . . yes

   C(3)      C(12)     C(10)     149.4(3)   . . . yes

   C(3)      C(12)     C(11)     91.1(2)    . . . yes

   C(3)      C(12)     C(13)     177.9(2)   . . . yes

   C(4)      C(12)     C(9)      150.0(3)   . . . yes

   C(4)      C(12)     C(10)     121.6(4)   . . . yes

   C(4)      C(12)     C(11)     119.0(4)   . . . yes

   C(4)      C(12)     C(13)     150.1(3)   . . . yes

   C(9)      C(12)     C(10)     88.4(2)    . . . yes

   C(9)      C(12)     C(11)     31.0(2)    . . . yes

   C(9)      C(12)     C(13)     60.0(1)    . . . yes

   C(10)     C(12)     C(11)     119.3(3)   . . . yes

   C(10)     C(12)     C(13)     28.5(2)    . . . yes

   C(11)     C(12)     C(13)     91.0(2)    . . . yes

   C(5)      C(13)     C(6)      28.2(3)    . . . yes

   C(5)      C(13)     C(8)      87.6(3)    . . . yes

   C(5)      C(13)     C(9)      148.8(3)   . . . yes

   C(5)      C(13)     C(10)     122.5(4)   . . . yes

   C(5)      C(13)     C(12)     151.0(3)   . . . yes

   C(5)      C(13)     C(14)     118.3(4)   . . . yes

   C(6)      C(13)     C(8)      59.4(2)    . . . yes

   C(6)      C(13)     C(9)      121.0(2)   . . . yes

   C(6)      C(13)     C(10)     150.7(3)   . . . yes

   C(6)      C(13)     C(12)     179.2(2)   . . . yes

   C(6)      C(13)     C(14)     90.1(3)    . . . yes

   C(8)      C(13)     C(9)      62.1(1)    . . . yes

   C(8)      C(13)     C(10)     149.7(3)   . . . yes

   C(8)      C(13)     C(12)     121.4(2)   . . . yes

   C(8)      C(13)     C(14)     31.0(2)    . . . yes

   C(9)      C(13)     C(10)     88.2(2)    . . . yes

   C(9)      C(13)     C(12)     59.9(1)    . . . yes

   C(9)      C(13)     C(14)     31.1(1)    . . . yes

   C(10)     C(13)     C(12)     28.5(2)    . . . yes

   C(10)     C(13)     C(14)     119.1(3)   . . . yes

   C(12)     C(13)     C(14)     90.7(2)    . . . yes

   O(2)      C(14)     O(3)      65.0(1)    . . . yes

   O(2)      C(14)     C(5)      118.1(2)   . . . yes

   O(2)      C(14)     C(7)      60.2(2)    . . . yes

   O(2)      C(14)     C(8)      31.0(2)    . . . yes

   O(2)      C(14)     C(9)      94.7(2)    . . . yes

   O(2)      C(14)     C(10)     170.0(2)   . . . yes

   O(2)      C(14)     C(11)     121.6(1)   . . . yes

   O(2)      C(14)     C(13)     147.9(2)   . . . yes

   O(3)      C(14)     C(5)      170.2(1)   . . . yes

   O(3)      C(14)     C(7)      122.9(2)   . . . yes

   O(3)      C(14)     C(8)      94.7(2)    . . . yes

   O(3)      C(14)     C(9)      31.0(1)    . . . yes

   O(3)      C(14)     C(10)     118.1(2)   . . . yes

   O(3)      C(14)     C(11)     59.17(10)  . . . yes

   O(3)      C(14)     C(13)     147.1(2)   . . . yes

   C(5)      C(14)     C(7)      58.3(2)    . . . yes

   C(5)      C(14)     C(8)      87.4(2)    . . . yes

   C(5)      C(14)     C(9)      147.1(3)   . . . yes

   C(5)      C(14)     C(10)     60.5(2)    . . . yes

   C(5)      C(14)     C(11)     119.8(2)   . . . yes

   C(5)      C(14)     C(13)     30.8(2)    . . . yes

   C(7)      C(14)     C(8)      29.2(2)    . . . yes

   C(7)      C(14)     C(9)      153.9(2)   . . . yes

   C(7)      C(14)     C(10)     118.6(2)   . . . yes

   C(7)      C(14)     C(11)     177.7(2)   . . . yes

   C(7)      C(14)     C(13)     89.0(2)    . . . yes

   C(8)      C(14)     C(9)      125.2(3)   . . . yes

   C(8)      C(14)     C(10)     147.2(2)   . . . yes

   C(8)      C(14)     C(11)     152.5(2)   . . . yes

   C(8)      C(14)     C(13)     117.9(3)   . . . yes

   C(9)      C(14)     C(10)     87.4(2)    . . . yes

   C(9)      C(14)     C(11)     28.2(1)    . . . yes

   C(9)      C(14)     C(13)     116.9(3)   . . . yes

   C(10)     C(14)     C(11)     59.4(1)    . . . yes

   C(10)     C(14)     C(13)     29.7(2)    . . . yes

   C(11)     C(14)     C(13)     89.1(2)    . . . yes

   O(1)      C(15)     C(1)      30.1(2)    . . . yes

   O(2)      C(16)     C(8)      30.0(2)    . . . yes

   P(1)      C(17)     O(5)      29.7(1)    . . . yes

   P(1)      C(17)     C(18)     131.1(4)   . . . yes

   O(5)      C(17)     C(18)     108.9(4)   . . . yes

   O(5)      C(18)     C(17)     35.4(2)    . . . yes

   P(1)      C(19)     O(6)      31.4(1)    . . . yes

   P(1)      C(19)     C(20)     139.0(3)   . . . yes

   O(6)      C(19)     C(20)     109.7(4)   . . . yes

   O(6)      C(20)     C(19)     35.0(2)    . . . yes

#------------------------------------------------------------------------------

loop_

_geom_torsion_atom_site_label_1

_geom_torsion_atom_site_label_2

_geom_torsion_atom_site_label_3

_geom_torsion_atom_site_label_4

_geom_torsion

_geom_torsion_site_symmetry_1

_geom_torsion_site_symmetry_2

_geom_torsion_site_symmetry_3

_geom_torsion_site_symmetry_4

_geom_torsion_publ_flag

 P(1)      O(3)      O(1)      C(1)      114.7(2)   . . . . yes

 P(1)      O(3)      O(1)      C(2)      113.0(2)   . . . . yes

 P(1)      O(3)      O(1)      C(11)     118.5(1)   . . . . yes

 P(1)      O(3)      O(1)      C(15)     -31.3(4)   . . . . yes

 P(1)      O(3)      O(2)      C(7)      -98.2(2)   . . . . yes

 P(1)      O(3)      O(2)      C(8)      -104.8(2)  . . . . yes

 P(1)      O(3)      O(2)      C(14)     -114.7(1)  . . . . yes

 P(1)      O(3)      O(2)      C(16)     38.3(5)    . . . . yes

 P(1)      O(3)      O(4)      O(5)      -36.7(1)   . . . . yes

 P(1)      O(3)      O(4)      O(6)      35.1(1)    . . . . yes

 P(1)      O(3)      O(5)      O(4)      29.00(9)   . . . . yes

 P(1)      O(3)      O(5)      O(6)      -43.1(1)   . . . . yes

 P(1)      O(3)      O(5)      C(17)     -134.4(3)  . . . . yes

 P(1)      O(3)      O(5)      C(18)     -169.4(2)  . . . . yes

 P(1)      O(3)      O(6)      O(4)      -26.85(10) . . . . yes

 P(1)      O(3)      O(6)      O(5)      41.42(10)  . . . . yes

 P(1)      O(3)      O(6)      C(19)     5.6(10)    . . . . yes

 P(1)      O(3)      O(6)      C(20)     139.2(7)   . . . . yes

 P(1)      O(3)      C(9)      C(1)      -84.2(2)   . . . . yes

 P(1)      O(3)      C(9)      C(8)      103.6(2)   . . . . yes

 P(1)      O(3)      C(9)      C(11)     -81.7(3)   . . . . yes

 P(1)      O(3)      C(9)      C(12)     -75.7(4)   . . . . yes

 P(1)      O(3)      C(9)      C(13)     88.3(4)    . . . . yes

 P(1)      O(3)      C(9)      C(14)     98.7(2)    . . . . yes

 P(1)      O(3)      C(11)     O(1)      -73.5(1)   . . . . yes

 P(1)      O(3)      C(11)     C(1)      -69.9(2)   . . . . yes

 P(1)      O(3)      C(11)     C(2)      -67.8(2)   . . . . yes

 P(1)      O(3)      C(11)     C(4)      47(2)      . . . . yes

 P(1)      O(3)      C(11)     C(9)      114.5(3)   . . . . yes

 P(1)      O(3)      C(11)     C(10)     107.1(2)   . . . . yes

 P(1)      O(3)      C(11)     C(12)     105.1(4)   . . . . yes

 P(1)      O(3)      C(11)     C(14)     114.7(1)   . . . . yes

 P(1)      O(3)      C(14)     O(2)      96.4(1)    . . . . yes

 P(1)      O(3)      C(14)     C(5)      -14(1)     . . . . yes

 P(1)      O(3)      C(14)     C(7)      79.2(2)    . . . . yes

 P(1)      O(3)      C(14)     C(8)      87.1(2)    . . . . yes

 P(1)      O(3)      C(14)     C(9)      -101.6(2)  . . . . yes

 P(1)      O(3)      C(14)     C(10)     -94.2(2)   . . . . yes

 P(1)      O(3)      C(14)     C(11)     -101.8(1)  . . . . yes

 P(1)      O(3)      C(14)     C(13)     -84.8(4)   . . . . yes

 P(1)      O(4)      O(3)      O(1)      119.2(2)   . . . . yes

 P(1)      O(4)      O(3)      O(2)      -64.2(2)   . . . . yes

 P(1)      O(4)      O(3)      O(5)      36.7(1)    . . . . yes

 P(1)      O(4)      O(3)      O(6)      -35.1(1)   . . . . yes

 P(1)      O(4)      O(3)      C(9)      -154.9(2)  . . . . yes

 P(1)      O(4)      O(3)      C(11)     176.8(2)   . . . . yes

 P(1)      O(4)      O(3)      C(14)     -125.0(2)  . . . . yes

 P(1)      O(4)      O(5)      O(3)      -34.06(10) . . . . yes

 P(1)      O(4)      O(5)      O(6)      33.2(1)    . . . . yes

 P(1)      O(4)      O(5)      C(17)     7.9(7)     . . . . yes

 P(1)      O(4)      O(5)      C(18)     -101.1(6)  . . . . yes

 P(1)      O(4)      O(6)      O(3)      34.7(1)    . . . . yes

 P(1)      O(4)      O(6)      O(5)      -35.3(1)   . . . . yes

 P(1)      O(4)      O(6)      C(19)     -134.2(4)  . . . . yes

 P(1)      O(4)      O(6)      C(20)     -139.4(3)  . . . . yes

 P(1)      O(5)      O(3)      O(1)      -109.0(1)  . . . . yes

 P(1)      O(5)      O(3)      O(2)      91.5(1)    . . . . yes

 P(1)      O(5)      O(3)      O(4)      -29.00(9)  . . . . yes

 P(1)      O(5)      O(3)      O(6)      43.1(1)    . . . . yes

 P(1)      O(5)      O(3)      C(9)      -54.8(4)   . . . . yes

 P(1)      O(5)      O(3)      C(11)     -81.7(2)   . . . . yes

 P(1)      O(5)      O(3)      C(14)     24.9(3)    . . . . yes

 P(1)      O(5)      O(4)      O(3)      34.06(10)  . . . . yes

 P(1)      O(5)      O(4)      O(6)      -33.2(1)   . . . . yes

 P(1)      O(5)      O(6)      O(3)      -44.56(9)  . . . . yes

 P(1)      O(5)      O(6)      O(4)      29.16(10)  . . . . yes

 P(1)      O(5)      O(6)      C(19)     123.2(3)   . . . . yes

 P(1)      O(5)      O(6)      C(20)     156.0(3)   . . . . yes

 P(1)      O(5)      C(17)     C(18)     -143.1(4)  . . . . yes

 P(1)      O(5)      C(18)     C(17)     65.0(6)    . . . . yes

 P(1)      O(6)      O(3)      O(1)      -5.6(2)    . . . . yes

 P(1)      O(6)      O(3)      O(2)      -176.8(2)  . . . . yes

 P(1)      O(6)      O(3)      O(4)      26.85(10)  . . . . yes

 P(1)      O(6)      O(3)      O(5)      -41.42(10) . . . . yes

 P(1)      O(6)      O(3)      C(9)      107.2(2)   . . . . yes

 P(1)      O(6)      O(3)      C(11)     73.2(2)    . . . . yes

 P(1)      O(6)      O(3)      C(14)     131.8(1)   . . . . yes

 P(1)      O(6)      O(4)      O(3)      -34.7(1)   . . . . yes

 P(1)      O(6)      O(4)      O(5)      35.3(1)    . . . . yes

 P(1)      O(6)      O(5)      O(3)      44.56(9)   . . . . yes

 P(1)      O(6)      O(5)      O(4)      -29.16(10) . . . . yes

 P(1)      O(6)      O(5)      C(17)     140.4(3)   . . . . yes

 P(1)      O(6)      O(5)      C(18)     133.1(3)   . . . . yes

 P(1)      O(6)      C(19)     C(20)     161.6(4)   . . . . yes

 P(1)      O(6)      C(20)     C(19)     -35.3(7)   . . . . yes

 P(1)      C(9)      O(3)      O(1)      88.4(2)    . . . . yes

 P(1)      C(9)      O(3)      O(2)      -113.7(2)  . . . . yes

 P(1)      C(9)      O(3)      O(4)      14.5(1)    . . . . yes

 P(1)      C(9)      O(3)      O(5)      36.5(3)    . . . . yes

 P(1)      C(9)      O(3)      O(6)      -45.9(1)   . . . . yes

 P(1)      C(9)      O(3)      C(11)     81.7(3)    . . . . yes

 P(1)      C(9)      O(3)      C(14)     -98.7(2)   . . . . yes

 P(1)      C(9)      C(1)      O(1)      -38.5(2)   . . . . yes

 P(1)      C(9)      C(1)      C(2)      143.2(4)   . . . . yes

 P(1)      C(9)      C(1)      C(3)      143.5(2)   . . . . yes

 P(1)      C(9)      C(1)      C(11)     144.7(3)   . . . . yes

 P(1)      C(9)      C(1)      C(12)     144.5(1)   . . . . yes

 P(1)      C(9)      C(1)      C(15)     -28.1(2)   . . . . yes

 P(1)      C(9)      C(8)      O(2)      49.3(2)    . . . . yes

 P(1)      C(9)      C(8)      C(6)      -132.7(1)  . . . . yes

 P(1)      C(9)      C(8)      C(7)      -127.5(4)  . . . . yes

 P(1)      C(9)      C(8)      C(13)     -140.9(1)  . . . . yes

 P(1)      C(9)      C(8)      C(14)     -140.6(3)  . . . . yes

 P(1)      C(9)      C(8)      C(16)     41.3(2)    . . . . yes

 P(1)      C(9)      C(11)     O(1)      -39.8(2)   . . . . yes

 P(1)      C(9)      C(11)     O(3)      -32.6(1)   . . . . yes

 P(1)      C(9)      C(11)     C(1)      -38.0(3)   . . . . yes

 P(1)      C(9)      C(11)     C(2)      -36.9(5)   . . . . yes

 P(1)      C(9)      C(11)     C(4)      140.7(3)   . . . . yes

 P(1)      C(9)      C(11)     C(10)     140.9(1)   . . . . yes

 P(1)      C(9)      C(11)     C(12)     141.7(2)   . . . . yes

 P(1)      C(9)      C(11)     C(14)     147.8(3)   . . . . yes

 P(1)      C(9)      C(12)     C(1)      -52.6(2)   . . . . yes

 P(1)      C(9)      C(12)     C(3)      -51.5(3)   . . . . yes

 P(1)      C(9)      C(12)     C(4)      -50.8(6)   . . . . yes

 P(1)      C(9)      C(12)     C(10)     125.8(2)   . . . . yes

 P(1)      C(9)      C(12)     C(11)     -52.7(3)   . . . . yes

 P(1)      C(9)      C(12)     C(13)     127.9(2)   . . . . yes

 P(1)      C(9)      C(13)     C(5)      50.9(5)    . . . . yes

 P(1)      C(9)      C(13)     C(6)      57.4(3)    . . . . yes

 P(1)      C(9)      C(13)     C(8)      66.0(2)    . . . . yes

 P(1)      C(9)      C(13)     C(10)     -120.6(2)  . . . . yes

 P(1)      C(9)      C(13)     C(12)     -122.7(2)  . . . . yes

 P(1)      C(9)      C(13)     C(14)     65.7(3)    . . . . yes

 P(1)      C(9)      C(14)     O(2)      51.1(2)    . . . . yes

 P(1)      C(9)      C(14)     O(3)      34.9(1)    . . . . yes

 P(1)      C(9)      C(14)     C(5)      -126.9(3)  . . . . yes

 P(1)      C(9)      C(14)     C(7)      36.3(5)    . . . . yes

 P(1)      C(9)      C(14)     C(8)      45.5(3)    . . . . yes

 P(1)      C(9)      C(14)     C(10)     -138.6(1)  . . . . yes

 P(1)      C(9)      C(14)     C(11)     -145.5(3)  . . . . yes

 P(1)      C(9)      C(14)     C(13)     -135.1(2)  . . . . yes

 P(1)      C(17)     O(5)      O(3)      31.9(2)    . . . . yes

 P(1)      C(17)     O(5)      O(4)      -5.1(4)    . . . . yes

 P(1)      C(17)     O(5)      O(6)      -27.3(2)   . . . . yes

 P(1)      C(17)     O(5)      C(18)     143.1(4)   . . . . yes

 P(1)      C(17)     C(18)     O(5)      -23.3(2)   . . . . yes

 P(1)      C(19)     O(6)      O(3)      -4.1(7)    . . . . yes

 P(1)      C(19)     O(6)      O(4)      24.7(2)    . . . . yes

 P(1)      C(19)     O(6)      O(5)      -35.4(2)   . . . . yes

 P(1)      C(19)     O(6)      C(20)     -161.6(4)  . . . . yes

 P(1)      C(19)     C(20)     O(6)      14.5(3)    . . . . yes

 O(1)      O(3)      P(1)      O(4)      -57.1(2)   . . . . yes

 O(1)      O(3)      P(1)      O(5)      66.4(1)    . . . . yes

 O(1)      O(3)      P(1)      O(6)      175.6(1)   . . . . yes

 O(1)      O(3)      P(1)      C(9)      -87.1(2)   . . . . yes

 O(1)      O(3)      P(1)      C(17)     89.4(1)    . . . . yes

 O(1)      O(3)      P(1)      C(19)     174.2(2)   . . . . yes

 O(1)      O(3)      O(2)      C(7)      102.1(3)   . . . . yes

 O(1)      O(3)      O(2)      C(8)      95.5(3)    . . . . yes

 O(1)      O(3)      O(2)      C(14)     85.6(3)    . . . . yes

 O(1)      O(3)      O(2)      C(16)     -121.4(5)  . . . . yes

 O(1)      O(3)      O(4)      O(5)      82.5(1)    . . . . yes

 O(1)      O(3)      O(4)      O(6)      154.3(1)   . . . . yes

 O(1)      O(3)      O(5)      O(4)      -80.0(1)   . . . . yes

 O(1)      O(3)      O(5)      O(6)      -152.1(1)  . . . . yes

 O(1)      O(3)      O(5)      C(17)     116.6(3)   . . . . yes

 O(1)      O(3)      O(5)      C(18)     81.6(2)    . . . . yes

 O(1)      O(3)      O(6)      O(4)      -32.5(2)   . . . . yes

 O(1)      O(3)      O(6)      O(5)      35.8(2)    . . . . yes

 O(1)      O(3)      O(6)      C(19)     0(1)       . . . . yes

 O(1)      O(3)      O(6)      C(20)     133.5(6)   . . . . yes

 O(1)      O(3)      C(9)      C(1)      4.2(1)     . . . . yes

 O(1)      O(3)      C(9)      C(8)      -168.0(1)  . . . . yes

 O(1)      O(3)      C(9)      C(11)     6.7(2)     . . . . yes

 O(1)      O(3)      C(9)      C(12)     12.7(4)    . . . . yes

 O(1)      O(3)      C(9)      C(13)     176.7(3)   . . . . yes

 O(1)      O(3)      C(9)      C(14)     -173.0(2)  . . . . yes

 O(1)      O(3)      C(11)     C(1)      3.6(1)     . . . . yes

 O(1)      O(3)      C(11)     C(2)      5.7(2)     . . . . yes

 O(1)      O(3)      C(11)     C(4)      120(2)     . . . . yes

 O(1)      O(3)      C(11)     C(9)      -172.1(3)  . . . . yes

 O(1)      O(3)      C(11)     C(10)     -179.4(2)  . . . . yes

 O(1)      O(3)      C(11)     C(12)     178.5(4)   . . . . yes

 O(1)      O(3)      C(11)     C(14)     -171.8(1)  . . . . yes

 O(1)      O(3)      C(14)     O(2)      -154.0(1)  . . . . yes

 O(1)      O(3)      C(14)     C(5)      94(1)      . . . . yes

 O(1)      O(3)      C(14)     C(7)      -171.2(2)  . . . . yes

 O(1)      O(3)      C(14)     C(8)      -163.3(2)  . . . . yes

 O(1)      O(3)      C(14)     C(9)      8.0(2)     . . . . yes

 O(1)      O(3)      C(14)     C(10)     15.4(2)    . . . . yes

 O(1)      O(3)      C(14)     C(11)     7.8(1)     . . . . yes

 O(1)      O(3)      C(14)     C(13)     24.7(4)    . . . . yes

 O(1)      C(1)      C(2)      C(3)      -177.5(3)  . . . . yes

 O(1)      C(1)      C(2)      C(4)      -176.9(3)  . . . . yes

 O(1)      C(1)      C(2)      C(11)     -177.2(5)  . . . . yes

 O(1)      C(1)      C(3)      C(2)      4.6(6)     . . . . yes

 O(1)      C(1)      C(3)      C(4)      -174.4(5)  . . . . yes

 O(1)      C(1)      C(3)      C(12)     -174.6(5)  . . . . yes

 O(1)      C(1)      C(9)      O(3)      -7.9(2)    . . . . yes

 O(1)      C(1)      C(9)      C(8)      94(1)      . . . . yes

 O(1)      C(1)      C(9)      C(11)     176.8(3)   . . . . yes

 O(1)      C(1)      C(9)      C(12)     177.0(2)   . . . . yes

 O(1)      C(1)      C(9)      C(13)     176.5(2)   . . . . yes

 O(1)      C(1)      C(9)      C(14)     166.8(4)   . . . . yes

 O(1)      C(1)      C(11)     O(3)      -6.4(3)    . . . . yes

 O(1)      C(1)      C(11)     C(2)      177.3(4)   . . . . yes

 O(1)      C(1)      C(11)     C(4)      177.1(2)   . . . . yes

 O(1)      C(1)      C(11)     C(9)      -3.6(4)    . . . . yes

 O(1)      C(1)      C(11)     C(10)     178.5(3)   . . . . yes

 O(1)      C(1)      C(11)     C(12)     176.7(2)   . . . . yes

 O(1)      C(1)      C(11)     C(14)     2.6(6)     . . . . yes

 O(1)      C(1)      C(12)     C(3)      175.4(4)   . . . . yes

 O(1)      C(1)      C(12)     C(4)      175.2(4)   . . . . yes

 O(1)      C(1)      C(12)     C(9)      -5.7(4)    . . . . yes

 O(1)      C(1)      C(12)     C(10)     -9.1(7)    . . . . yes

 O(1)      C(1)      C(12)     C(11)     -5.6(4)    . . . . yes

 O(1)      C(1)      C(12)     C(13)     -5.3(5)    . . . . yes

 O(1)      C(2)      C(1)      C(3)      177.5(3)   . . . . yes

 O(1)      C(2)      C(1)      C(9)      177.9(6)   . . . . yes

 O(1)      C(2)      C(1)      C(11)     177.2(5)   . . . . yes

 O(1)      C(2)      C(1)      C(12)     176.8(3)   . . . . yes

 O(1)      C(2)      C(1)      C(15)     -9.6(2)    . . . . yes

 O(1)      C(2)      C(3)      C(1)      -2.3(3)    . . . . yes

 O(1)      C(2)      C(3)      C(4)      -1.2(9)    . . . . yes

 O(1)      C(2)      C(3)      C(12)     -1.7(6)    . . . . yes

 O(1)      C(2)      C(4)      C(3)      179.3(5)   . . . . yes

 O(1)      C(2)      C(4)      C(10)     -2.8(3)    . . . . yes

 O(1)      C(2)      C(4)      C(11)     -1.8(2)    . . . . yes

 O(1)      C(2)      C(4)      C(12)     -1.5(3)    . . . . yes

 O(1)      C(2)      C(11)     O(3)      -6.0(2)    . . . . yes

 O(1)      C(2)      C(11)     C(1)      -1.6(3)    . . . . yes

 O(1)      C(2)      C(11)     C(4)      178.2(2)   . . . . yes

 O(1)      C(2)      C(11)     C(9)      -3.4(5)    . . . . yes

 O(1)      C(2)      C(11)     C(10)     179.1(2)   . . . . yes

 O(1)      C(2)      C(11)     C(12)     177.8(2)   . . . . yes

 O(1)      C(2)      C(11)     C(14)     138(2)     . . . . yes

 O(1)      C(11)     O(3)      O(2)      154.9(1)   . . . . yes

 O(1)      C(11)     O(3)      O(4)      -75.2(1)   . . . . yes

 O(1)      C(11)     O(3)      O(5)      -32.0(1)   . . . . yes

 O(1)      C(11)     O(3)      O(6)      -114.9(2)  . . . . yes

 O(1)      C(11)     O(3)      C(9)      172.1(3)   . . . . yes

 O(1)      C(11)     O(3)      C(14)     171.8(1)   . . . . yes

 O(1)      C(11)     C(1)      C(2)      -177.3(4)  . . . . yes

 O(1)      C(11)     C(1)      C(3)      -177.5(3)  . . . . yes

 O(1)      C(11)     C(1)      C(9)      3.6(4)     . . . . yes

 O(1)      C(11)     C(1)      C(12)     -176.7(2)  . . . . yes

 O(1)      C(11)     C(1)      C(15)     14.9(3)    . . . . yes

 O(1)      C(11)     C(2)      C(1)      1.6(3)     . . . . yes

 O(1)      C(11)     C(2)      C(3)      -178.7(3)  . . . . yes

 O(1)      C(11)     C(2)      C(4)      -178.2(2)  . . . . yes

 O(1)      C(11)     C(4)      C(2)      1.8(2)     . . . . yes

 O(1)      C(11)     C(4)      C(3)      2.4(3)     . . . . yes

 O(1)      C(11)     C(4)      C(10)     -179.2(2)  . . . . yes

 O(1)      C(11)     C(4)      C(12)     -177.6(3)  . . . . yes

 O(1)      C(11)     C(9)      O(3)      -7.2(2)    . . . . yes

 O(1)      C(11)     C(9)      C(1)      -1.8(2)    . . . . yes

 O(1)      C(11)     C(9)      C(8)      162.0(3)   . . . . yes

 O(1)      C(11)     C(9)      C(12)     178.5(3)   . . . . yes

 O(1)      C(11)     C(9)      C(13)     177.9(1)   . . . . yes

 O(1)      C(11)     C(9)      C(14)     172.4(2)   . . . . yes

 O(1)      C(11)     C(10)     C(4)      14(3)      . . . . yes

 O(1)      C(11)     C(10)     C(5)      -165(2)    . . . . yes

 O(1)      C(11)     C(10)     C(12)     12(3)      . . . . yes

 O(1)      C(11)     C(10)     C(13)     -163(2)    . . . . yes

 O(1)      C(11)     C(10)     C(14)     -162(3)    . . . . yes

 O(1)      C(11)     C(12)     C(1)      3.1(2)     . . . . yes

 O(1)      C(11)     C(12)     C(3)      4.0(4)     . . . . yes

 O(1)      C(11)     C(12)     C(4)      4.0(6)     . . . . yes

 O(1)      C(11)     C(12)     C(9)      -177.1(5)  . . . . yes

 O(1)      C(11)     C(12)     C(10)     -178.9(3)  . . . . yes

 O(1)      C(11)     C(12)     C(13)     -176.6(3)  . . . . yes

 O(1)      C(11)     C(14)     O(2)      10.5(2)    . . . . yes

 O(1)      C(11)     C(14)     O(3)      -8.8(1)    . . . . yes

 O(1)      C(11)     C(14)     C(5)      -177.5(2)  . . . . yes

 O(1)      C(11)     C(14)     C(7)      149(4)     . . . . yes

 O(1)      C(11)     C(14)     C(8)      10.7(5)    . . . . yes

 O(1)      C(11)     C(14)     C(9)      -9.1(3)    . . . . yes

 O(1)      C(11)     C(14)     C(10)     179.0(2)   . . . . yes

 O(1)      C(11)     C(14)     C(13)     -179.7(2)  . . . . yes

 O(1)      C(15)     C(1)      C(2)      164.6(4)   . . . . yes

 O(1)      C(15)     C(1)      C(3)      168.7(4)   . . . . yes

 O(1)      C(15)     C(1)      C(9)      -20.1(3)   . . . . yes

 O(1)      C(15)     C(1)      C(11)     -25.9(5)   . . . . yes

 O(1)      C(15)     C(1)      C(12)     -91(1)     . . . . yes

 O(2)      O(3)      P(1)      O(4)      130.6(2)   . . . . yes

 O(2)      O(3)      P(1)      O(5)      -105.9(1)  . . . . yes

 O(2)      O(3)      P(1)      O(6)      3.3(2)     . . . . yes

 O(2)      O(3)      P(1)      C(9)      100.6(2)   . . . . yes

 O(2)      O(3)      P(1)      C(17)     -82.9(2)   . . . . yes

 O(2)      O(3)      P(1)      C(19)     1.9(2)     . . . . yes

 O(2)      O(3)      O(1)      C(1)      -84.1(3)   . . . . yes

 O(2)      O(3)      O(1)      C(2)      -85.9(3)   . . . . yes

 O(2)      O(3)      O(1)      C(11)     -80.3(3)   . . . . yes

 O(2)      O(3)      O(1)      C(15)     129.9(4)   . . . . yes

 O(2)      O(3)      O(4)      O(5)      -100.8(2)  . . . . yes

 O(2)      O(3)      O(4)      O(6)      -29.1(1)   . . . . yes

 O(2)      O(3)      O(5)      O(4)      120.5(1)   . . . . yes

 O(2)      O(3)      O(5)      O(6)      48.4(1)    . . . . yes

 O(2)      O(3)      O(5)      C(17)     -42.9(3)   . . . . yes

 O(2)      O(3)      O(5)      C(18)     -77.9(2)   . . . . yes

 O(2)      O(3)      O(6)      O(4)      156.4(1)   . . . . yes

 O(2)      O(3)      O(6)      O(5)      -135.3(1)  . . . . yes

 O(2)      O(3)      O(6)      C(19)     -171(1)    . . . . yes

 O(2)      O(3)      O(6)      C(20)     -37.6(6)   . . . . yes

 O(2)      O(3)      C(9)      C(1)      162.2(1)   . . . . yes

 O(2)      O(3)      C(9)      C(8)      -10.1(1)   . . . . yes

 O(2)      O(3)      C(9)      C(11)     164.6(2)   . . . . yes

 O(2)      O(3)      C(9)      C(12)     170.7(3)   . . . . yes

 O(2)      O(3)      C(9)      C(13)     -25.4(3)   . . . . yes

 O(2)      O(3)      C(9)      C(14)     -15.0(2)   . . . . yes

 O(2)      O(3)      C(11)     C(1)      158.4(2)   . . . . yes

 O(2)      O(3)      C(11)     C(2)      160.6(2)   . . . . yes

 O(2)      O(3)      C(11)     C(4)      -84(2)     . . . . yes

 O(2)      O(3)      C(11)     C(9)      -17.2(2)   . . . . yes

 O(2)      O(3)      C(11)     C(10)     -24.6(2)   . . . . yes

 O(2)      O(3)      C(11)     C(12)     -26.6(4)   . . . . yes

 O(2)      O(3)      C(11)     C(14)     -17.0(1)   . . . . yes

 O(2)      O(3)      C(14)     C(5)      -111(1)    . . . . yes

 O(2)      O(3)      C(14)     C(7)      -17.2(2)   . . . . yes

 O(2)      O(3)      C(14)     C(8)      -9.3(1)    . . . . yes

 O(2)      O(3)      C(14)     C(9)      162.0(3)   . . . . yes

 O(2)      O(3)      C(14)     C(10)     169.4(2)   . . . . yes

 O(2)      O(3)      C(14)     C(11)     161.8(1)   . . . . yes

 O(2)      O(3)      C(14)     C(13)     178.8(4)   . . . . yes

 O(2)      C(7)      C(5)      C(6)      -179.5(5)  . . . . yes

 O(2)      C(7)      C(5)      C(10)     1.5(3)     . . . . yes

 O(2)      C(7)      C(5)      C(13)     3.4(3)     . . . . yes

 O(2)      C(7)      C(5)      C(14)     6.3(2)     . . . . yes

 O(2)      C(7)      C(6)      C(5)      0.8(8)     . . . . yes

 O(2)      C(7)      C(6)      C(8)      4.7(3)     . . . . yes

 O(2)      C(7)      C(6)      C(13)     2.5(6)     . . . . yes

 O(2)      C(7)      C(8)      C(6)      -174.6(3)  . . . . yes

 O(2)      C(7)      C(8)      C(9)      176.3(6)   . . . . yes

 O(2)      C(7)      C(8)      C(13)     -172.4(3)  . . . . yes

 O(2)      C(7)      C(8)      C(14)     -176.9(5)  . . . . yes

 O(2)      C(7)      C(8)      C(16)     5.9(2)     . . . . yes

 O(2)      C(7)      C(14)     O(3)      18.0(2)    . . . . yes

 O(2)      C(7)      C(14)     C(5)      -173.5(2)  . . . . yes

 O(2)      C(7)      C(14)     C(8)      1.7(3)     . . . . yes

 O(2)      C(7)      C(14)     C(9)      17.1(5)    . . . . yes

 O(2)      C(7)      C(14)     C(10)     -168.7(2)  . . . . yes

 O(2)      C(7)      C(14)     C(11)     -140(4)    . . . . yes

 O(2)      C(7)      C(14)     C(13)     -170.6(2)  . . . . yes

 O(2)      C(8)      C(6)      C(5)      166.3(5)   . . . . yes

 O(2)      C(8)      C(6)      C(7)      -10.3(6)   . . . . yes

 O(2)      C(8)      C(6)      C(13)     167.2(5)   . . . . yes

 O(2)      C(8)      C(7)      C(5)      172.7(3)   . . . . yes

 O(2)      C(8)      C(7)      C(6)      174.6(3)   . . . . yes

 O(2)      C(8)      C(7)      C(14)     176.9(5)   . . . . yes

 O(2)      C(8)      C(9)      O(3)      19.3(2)    . . . . yes

 O(2)      C(8)      C(9)      C(1)      -82(1)     . . . . yes

 O(2)      C(8)      C(9)      C(11)     -151.3(4)  . . . . yes

 O(2)      C(8)      C(9)      C(12)     -161.1(2)  . . . . yes

 O(2)      C(8)      C(9)      C(13)     -169.7(2)  . . . . yes

 O(2)      C(8)      C(9)      C(14)     -170.1(4)  . . . . yes

 O(2)      C(8)      C(13)     C(5)      -169.2(4)  . . . . yes

 O(2)      C(8)      C(13)     C(6)      -170.0(4)  . . . . yes

 O(2)      C(8)      C(13)     C(9)      18.6(3)    . . . . yes

 O(2)      C(8)      C(13)     C(10)     5.5(7)     . . . . yes

 O(2)      C(8)      C(13)     C(12)     9.8(4)     . . . . yes

 O(2)      C(8)      C(13)     C(14)     18.8(4)    . . . . yes

 O(2)      C(8)      C(14)     O(3)      16.5(3)    . . . . yes

 O(2)      C(8)      C(14)     C(5)      -173.1(2)  . . . . yes

 O(2)      C(8)      C(14)     C(7)      -177.2(4)  . . . . yes

 O(2)      C(8)      C(14)     C(9)      11.1(4)    . . . . yes

 O(2)      C(8)      C(14)     C(10)     -161.4(3)  . . . . yes

 O(2)      C(8)      C(14)     C(11)     -0.2(6)    . . . . yes

 O(2)      C(8)      C(14)     C(13)     -168.4(2)  . . . . yes

 O(2)      C(14)     O(3)      O(4)      125.1(1)   . . . . yes

 O(2)      C(14)     O(3)      O(5)      78.7(3)    . . . . yes

 O(2)      C(14)     O(3)      O(6)      62.7(1)    . . . . yes

 O(2)      C(14)     O(3)      C(9)      -162.0(3)  . . . . yes

 O(2)      C(14)     O(3)      C(11)     -161.8(1)  . . . . yes

 O(2)      C(14)     C(5)      C(6)      -9.3(3)    . . . . yes

 O(2)      C(14)     C(5)      C(7)      -6.4(2)    . . . . yes

 O(2)      C(14)     C(5)      C(10)     168.7(2)   . . . . yes

 O(2)      C(14)     C(5)      C(13)     167.9(3)   . . . . yes

 O(2)      C(14)     C(7)      C(5)      173.5(2)   . . . . yes

 O(2)      C(14)     C(7)      C(6)      176.3(3)   . . . . yes

 O(2)      C(14)     C(7)      C(8)      -1.7(3)    . . . . yes

 O(2)      C(14)     C(8)      C(6)      176.0(3)   . . . . yes

 O(2)      C(14)     C(8)      C(7)      177.2(4)   . . . . yes

 O(2)      C(14)     C(8)      C(9)      -11.1(4)   . . . . yes

 O(2)      C(14)     C(8)      C(13)     168.4(2)   . . . . yes

 O(2)      C(14)     C(8)      C(16)     -8.1(3)    . . . . yes

 O(2)      C(14)     C(9)      O(3)      16.3(2)    . . . . yes

 O(2)      C(14)     C(9)      C(1)      -157.8(3)  . . . . yes

 O(2)      C(14)     C(9)      C(8)      5.7(2)     . . . . yes

 O(2)      C(14)     C(9)      C(11)     -163.3(2)  . . . . yes

 O(2)      C(14)     C(9)      C(12)     -166.5(1)  . . . . yes

 O(2)      C(14)     C(9)      C(13)     -173.8(3)  . . . . yes

 O(2)      C(14)     C(10)     C(4)      94(1)      . . . . yes

 O(2)      C(14)     C(10)     C(5)      -84(1)     . . . . yes

 O(2)      C(14)     C(10)     C(11)     98(1)      . . . . yes

 O(2)      C(14)     C(10)     C(12)     95(1)      . . . . yes

 O(2)      C(14)     C(10)     C(13)     -84(1)     . . . . yes

 O(2)      C(14)     C(11)     O(3)      19.4(1)    . . . . yes

 O(2)      C(14)     C(11)     C(1)      9.0(5)     . . . . yes

 O(2)      C(14)     C(11)     C(2)      -126(2)    . . . . yes

 O(2)      C(14)     C(11)     C(4)      -164.7(2)  . . . . yes

 O(2)      C(14)     C(11)     C(9)      19.6(3)    . . . . yes

 O(2)      C(14)     C(11)     C(10)     -168.4(2)  . . . . yes

 O(2)      C(14)     C(11)     C(12)     -165.8(2)  . . . . yes

 O(2)      C(14)     C(13)     C(5)      -20.3(5)   . . . . yes

 O(2)      C(14)     C(13)     C(6)      -18.8(4)   . . . . yes

 O(2)      C(14)     C(13)     C(8)      -11.2(2)   . . . . yes

 O(2)      C(14)     C(13)     C(9)      168.3(5)   . . . . yes

 O(2)      C(14)     C(13)     C(10)     161.1(3)   . . . . yes

 O(2)      C(14)     C(13)     C(12)     161.1(3)   . . . . yes

 O(2)      C(16)     C(8)      C(6)      -171.0(3)  . . . . yes

 O(2)      C(16)     C(8)      C(7)      -170.7(4)  . . . . yes

 O(2)      C(16)     C(8)      C(9)      15.4(3)    . . . . yes

 O(2)      C(16)     C(8)      C(13)     -31(3)     . . . . yes

 O(2)      C(16)     C(8)      C(14)     13.8(5)    . . . . yes

 O(3)      P(1)      O(4)      O(5)      119.2(2)   . . . . yes

 O(3)      P(1)      O(4)      O(6)      -119.5(2)  . . . . yes

 O(3)      P(1)      O(5)      O(4)      -127.0(1)  . . . . yes

 O(3)      P(1)      O(5)      O(6)      105.8(1)   . . . . yes

 O(3)      P(1)      O(5)      C(17)     57.0(3)    . . . . yes

 O(3)      P(1)      O(5)      C(18)     18.2(4)    . . . . yes

 O(3)      P(1)      O(6)      O(4)      127.9(1)   . . . . yes

 O(3)      P(1)      O(6)      O(5)      -107.6(1)  . . . . yes

 O(3)      P(1)      O(6)      C(19)     -177.7(4)  . . . . yes

 O(3)      P(1)      O(6)      C(20)     -155.1(5)  . . . . yes

 O(3)      P(1)      C(9)      C(1)      95.6(2)    . . . . yes

 O(3)      P(1)      C(9)      C(8)      -78.5(2)   . . . . yes

 O(3)      P(1)      C(9)      C(11)     112.2(3)   . . . . yes

 O(3)      P(1)      C(9)      C(12)     138.8(3)   . . . . yes

 O(3)      P(1)      C(9)      C(13)     -131.2(3)  . . . . yes

 O(3)      P(1)      C(9)      C(14)     -98.0(3)   . . . . yes

 O(3)      P(1)      C(17)     O(5)      -125.3(3)  . . . . yes

 O(3)      P(1)      C(17)     C(18)     -76.5(5)   . . . . yes

 O(3)      P(1)      C(19)     O(6)      2.9(5)     . . . . yes

 O(3)      P(1)      C(19)     C(20)     -24.0(8)   . . . . yes

 O(3)      O(1)      C(1)      C(2)      -176.8(3)  . . . . yes

 O(3)      O(1)      C(1)      C(3)      -179.5(4)  . . . . yes

 O(3)      O(1)      C(1)      C(9)      4.3(1)     . . . . yes

 O(3)      O(1)      C(1)      C(11)     5.9(2)     . . . . yes

 O(3)      O(1)      C(1)      C(12)     9.2(4)     . . . . yes

 O(3)      O(1)      C(1)      C(15)     -158.4(3)  . . . . yes

 O(3)      O(1)      C(2)      C(1)      3.6(3)     . . . . yes

 O(3)      O(1)      C(2)      C(3)      7.9(6)     . . . . yes

 O(3)      O(1)      C(2)      C(4)      7.2(3)     . . . . yes

 O(3)      O(1)      C(2)      C(11)     5.3(1)     . . . . yes

 O(3)      O(1)      C(11)     C(1)      -173.0(3)  . . . . yes

 O(3)      O(1)      C(11)     C(2)      -174.5(1)  . . . . yes

 O(3)      O(1)      C(11)     C(4)      -176.3(2)  . . . . yes

 O(3)      O(1)      C(11)     C(9)      4.0(1)     . . . . yes

 O(3)      O(1)      C(11)     C(10)     170(3)     . . . . yes

 O(3)      O(1)      C(11)     C(12)     -178.5(4)  . . . . yes

 O(3)      O(1)      C(11)     C(14)     8.3(1)     . . . . yes

 O(3)      O(1)      C(15)     C(1)      140.6(5)   . . . . yes

 O(3)      O(2)      C(7)      C(5)      -22.4(3)   . . . . yes

 O(3)      O(2)      C(7)      C(6)      -22.9(6)   . . . . yes

 O(3)      O(2)      C(7)      C(8)      -14.0(3)   . . . . yes

 O(3)      O(2)      C(7)      C(14)     -15.9(1)   . . . . yes

 O(3)      O(2)      C(8)      C(6)      173.8(5)   . . . . yes

 O(3)      O(2)      C(8)      C(7)      167.6(3)   . . . . yes

 O(3)      O(2)      C(8)      C(9)      -10.4(1)   . . . . yes

 O(3)      O(2)      C(8)      C(13)     -26.1(4)   . . . . yes

 O(3)      O(2)      C(8)      C(14)     -15.4(2)   . . . . yes

 O(3)      O(2)      C(8)      C(16)     156.3(3)   . . . . yes

 O(3)      O(2)      C(14)     C(5)      169.6(2)   . . . . yes

 O(3)      O(2)      C(14)     C(7)      163.4(1)   . . . . yes

 O(3)      O(2)      C(14)     C(8)      161.8(3)   . . . . yes

 O(3)      O(2)      C(14)     C(9)      -9.2(1)    . . . . yes

 O(3)      O(2)      C(14)     C(10)     -110(1)    . . . . yes

 O(3)      O(2)      C(14)     C(11)     -18.3(1)   . . . . yes

 O(3)      O(2)      C(14)     C(13)     -178.7(4)  . . . . yes

 O(3)      O(2)      C(16)     C(8)      -137.1(6)  . . . . yes

 O(3)      O(4)      P(1)      O(5)      -119.2(2)  . . . . yes

 O(3)      O(4)      P(1)      O(6)      119.5(2)   . . . . yes

 O(3)      O(4)      P(1)      C(9)      13.0(1)    . . . . yes

 O(3)      O(4)      P(1)      C(17)     -122.0(3)  . . . . yes

 O(3)      O(4)      P(1)      C(19)     142.8(2)   . . . . yes

 O(3)      O(4)      O(5)      O(6)      67.28(8)   . . . . yes

 O(3)      O(4)      O(5)      C(17)     42.0(7)    . . . . yes

 O(3)      O(4)      O(5)      C(18)     -67.0(6)   . . . . yes

 O(3)      O(4)      O(6)      O(5)      -70.0(1)   . . . . yes

 O(3)      O(4)      O(6)      C(19)     -168.9(3)  . . . . yes

 O(3)      O(4)      O(6)      C(20)     -174.0(3)  . . . . yes

 O(3)      O(5)      P(1)      O(4)      127.0(1)   . . . . yes

 O(3)      O(5)      P(1)      O(6)      -105.8(1)  . . . . yes

 O(3)      O(5)      P(1)      C(9)      14.5(1)    . . . . yes

 O(3)      O(5)      P(1)      C(17)     -57.0(3)   . . . . yes

 O(3)      O(5)      P(1)      C(19)     -132.9(1)  . . . . yes

 O(3)      O(5)      O(4)      O(6)      -67.28(8)  . . . . yes

 O(3)      O(5)      O(6)      O(4)      73.7(1)    . . . . yes

 O(3)      O(5)      O(6)      C(19)     167.7(3)   . . . . yes

 O(3)      O(5)      O(6)      C(20)     -159.4(2)  . . . . yes

 O(3)      O(5)      C(17)     C(18)     -111.3(4)  . . . . yes

 O(3)      O(5)      C(18)     C(17)     76.9(4)    . . . . yes

 O(3)      O(6)      P(1)      O(4)      -127.9(1)  . . . . yes

 O(3)      O(6)      P(1)      O(5)      107.6(1)   . . . . yes

 O(3)      O(6)      P(1)      C(9)      -27.30(8)  . . . . yes

 O(3)      O(6)      P(1)      C(17)     87.0(1)    . . . . yes

 O(3)      O(6)      P(1)      C(19)     177.7(4)   . . . . yes

 O(3)      O(6)      O(4)      O(5)      70.0(1)    . . . . yes

 O(3)      O(6)      O(5)      O(4)      -73.7(1)   . . . . yes

 O(3)      O(6)      O(5)      C(17)     95.8(2)    . . . . yes

 O(3)      O(6)      O(5)      C(18)     88.6(3)    . . . . yes

 O(3)      O(6)      C(19)     C(20)     157.5(7)   . . . . yes

 O(3)      O(6)      C(20)     C(19)     -153.6(8)  . . . . yes

 O(3)      C(9)      P(1)      O(4)      -153.5(2)  . . . . yes

 O(3)      C(9)      P(1)      O(5)      -32.9(2)   . . . . yes

 O(3)      C(9)      P(1)      O(6)      88.6(2)    . . . . yes

 O(3)      C(9)      P(1)      C(17)     -3.8(2)    . . . . yes

 O(3)      C(9)      P(1)      C(19)     103.7(3)   . . . . yes

 O(3)      C(9)      C(1)      C(2)      173.8(4)   . . . . yes

 O(3)      C(9)      C(1)      C(3)      174.0(2)   . . . . yes

 O(3)      C(9)      C(1)      C(11)     175.3(3)   . . . . yes

 O(3)      C(9)      C(1)      C(12)     175.1(2)   . . . . yes

 O(3)      C(9)      C(1)      C(15)     2.5(2)     . . . . yes

 O(3)      C(9)      C(8)      C(6)      -162.8(2)  . . . . yes

 O(3)      C(9)      C(8)      C(7)      -157.6(4)  . . . . yes

 O(3)      C(9)      C(8)      C(13)     -170.9(2)  . . . . yes

 O(3)      C(9)      C(8)      C(14)     -170.6(3)  . . . . yes

 O(3)      C(9)      C(8)      C(16)     11.3(2)    . . . . yes

 O(3)      C(9)      C(11)     C(1)      -5.4(4)    . . . . yes

 O(3)      C(9)      C(11)     C(2)      -4.3(6)    . . . . yes

 O(3)      C(9)      C(11)     C(4)      173.3(3)   . . . . yes

 O(3)      C(9)      C(11)     C(10)     173.5(2)   . . . . yes

 O(3)      C(9)      C(11)     C(12)     174.3(2)   . . . . yes

 O(3)      C(9)      C(11)     C(14)     -179.6(4)  . . . . yes

 O(3)      C(9)      C(12)     C(1)      -9.9(4)    . . . . yes

 O(3)      C(9)      C(12)     C(3)      -8.8(5)    . . . . yes

 O(3)      C(9)      C(12)     C(4)      -8.1(7)    . . . . yes

 O(3)      C(9)      C(12)     C(10)     168.4(4)   . . . . yes

 O(3)      C(9)      C(12)     C(11)     -10.1(4)   . . . . yes

 O(3)      C(9)      C(12)     C(13)     170.5(4)   . . . . yes

 O(3)      C(9)      C(13)     C(5)      2.7(7)     . . . . yes

 O(3)      C(9)      C(13)     C(6)      9.2(4)     . . . . yes

 O(3)      C(9)      C(13)     C(8)      17.8(3)    . . . . yes

 O(3)      C(9)      C(13)     C(10)     -168.8(3)  . . . . yes

 O(3)      C(9)      C(13)     C(12)     -170.9(4)  . . . . yes

 O(3)      C(9)      C(13)     C(14)     17.5(4)    . . . . yes

 O(3)      C(9)      C(14)     C(5)      -161.8(3)  . . . . yes

 O(3)      C(9)      C(14)     C(7)      1.5(6)     . . . . yes

 O(3)      C(9)      C(14)     C(8)      10.6(4)    . . . . yes

 O(3)      C(9)      C(14)     C(10)     -173.5(2)  . . . . yes

 O(3)      C(9)      C(14)     C(11)     179.6(4)   . . . . yes

 O(3)      C(9)      C(14)     C(13)     -169.9(2)  . . . . yes

 O(3)      C(11)     O(1)      C(1)      173.0(3)   . . . . yes

 O(3)      C(11)     O(1)      C(2)      174.5(1)   . . . . yes

 O(3)      C(11)     O(1)      C(15)     145.4(5)   . . . . yes

 O(3)      C(11)     C(1)      C(2)      176.3(3)   . . . . yes

 O(3)      C(11)     C(1)      C(3)      176.1(1)   . . . . yes

 O(3)      C(11)     C(1)      C(9)      -2.7(2)    . . . . yes

 O(3)      C(11)     C(1)      C(12)     177.0(3)   . . . . yes

 O(3)      C(11)     C(1)      C(15)     8.5(4)     . . . . yes

 O(3)      C(11)     C(2)      C(1)      -4.4(3)    . . . . yes

 O(3)      C(11)     C(2)      C(3)      175.3(2)   . . . . yes

 O(3)      C(11)     C(2)      C(4)      175.8(2)   . . . . yes

 O(3)      C(11)     C(4)      C(2)      -117(2)    . . . . yes

 O(3)      C(11)     C(4)      C(3)      -116(2)    . . . . yes

 O(3)      C(11)     C(4)      C(10)     61(2)      . . . . yes

 O(3)      C(11)     C(4)      C(12)     63(2)      . . . . yes

 O(3)      C(11)     C(9)      C(1)      5.4(4)     . . . . yes

 O(3)      C(11)     C(9)      C(8)      169.2(5)   . . . . yes

 O(3)      C(11)     C(9)      C(12)     -174.3(2)  . . . . yes

 O(3)      C(11)     C(9)      C(13)     -174.9(3)  . . . . yes

 O(3)      C(11)     C(9)      C(14)     179.6(4)   . . . . yes

 O(3)      C(11)     C(10)     C(4)      -176.1(2)  . . . . yes

 O(3)      C(11)     C(10)     C(5)      4.0(2)     . . . . yes

 O(3)      C(11)     C(10)     C(12)     -177.8(3)  . . . . yes

 O(3)      C(11)     C(10)     C(13)     6.2(2)     . . . . yes

 O(3)      C(11)     C(10)     C(14)     7.5(1)     . . . . yes

 O(3)      C(11)     C(12)     C(1)      -174.4(5)  . . . . yes

 O(3)      C(11)     C(12)     C(3)      -173.5(3)  . . . . yes

 O(3)      C(11)     C(12)     C(4)      -173.5(3)  . . . . yes

 O(3)      C(11)     C(12)     C(9)      5.4(2)     . . . . yes

 O(3)      C(11)     C(12)     C(10)     3.6(5)     . . . . yes

 O(3)      C(11)     C(12)     C(13)     5.9(4)     . . . . yes

 O(3)      C(11)     C(14)     C(5)      -168.7(2)  . . . . yes

 O(3)      C(11)     C(14)     C(7)      158(4)     . . . . yes

 O(3)      C(11)     C(14)     C(8)      19.5(4)    . . . . yes

 O(3)      C(11)     C(14)     C(9)      -0.2(2)    . . . . yes

 O(3)      C(11)     C(14)     C(10)     -172.2(1)  . . . . yes

 O(3)      C(11)     C(14)     C(13)     -170.9(2)  . . . . yes

 O(3)      C(14)     O(2)      C(7)      -163.4(1)  . . . . yes

 O(3)      C(14)     O(2)      C(8)      -161.8(3)  . . . . yes

 O(3)      C(14)     O(2)      C(16)     -146.7(5)  . . . . yes

 O(3)      C(14)     C(5)      C(6)      97(1)      . . . . yes

 O(3)      C(14)     C(5)      C(7)      100(1)     . . . . yes

 O(3)      C(14)     C(5)      C(10)     -84(1)     . . . . yes

 O(3)      C(14)     C(5)      C(13)     -85(1)     . . . . yes

 O(3)      C(14)     C(7)      C(5)      -168.5(2)  . . . . yes

 O(3)      C(14)     C(7)      C(6)      -165.7(2)  . . . . yes

 O(3)      C(14)     C(7)      C(8)      16.3(3)    . . . . yes

 O(3)      C(14)     C(8)      C(6)      -167.5(1)  . . . . yes

 O(3)      C(14)     C(8)      C(7)      -166.3(3)  . . . . yes

 O(3)      C(14)     C(8)      C(9)      5.5(2)     . . . . yes

 O(3)      C(14)     C(8)      C(13)     -175.1(3)  . . . . yes

 O(3)      C(14)     C(8)      C(16)     8.5(4)     . . . . yes

 O(3)      C(14)     C(9)      C(1)      -174.1(5)  . . . . yes

 O(3)      C(14)     C(9)      C(8)      -10.6(4)   . . . . yes

 O(3)      C(14)     C(9)      C(11)     -179.6(4)  . . . . yes

 O(3)      C(14)     C(9)      C(12)     177.2(3)   . . . . yes

 O(3)      C(14)     C(9)      C(13)     169.9(2)   . . . . yes

 O(3)      C(14)     C(10)     C(4)      -11.4(3)   . . . . yes

 O(3)      C(14)     C(10)     C(5)      168.9(2)   . . . . yes

 O(3)      C(14)     C(10)     C(11)     -7.6(1)    . . . . yes

 O(3)      C(14)     C(10)     C(12)     -10.3(3)   . . . . yes

 O(3)      C(14)     C(10)     C(13)     169.8(3)   . . . . yes

 O(3)      C(14)     C(11)     C(1)      -10.4(4)   . . . . yes

 O(3)      C(14)     C(11)     C(2)      -145(2)    . . . . yes

 O(3)      C(14)     C(11)     C(4)      175.9(2)   . . . . yes

 O(3)      C(14)     C(11)     C(9)      0.2(2)     . . . . yes

 O(3)      C(14)     C(11)     C(10)     172.2(1)   . . . . yes

 O(3)      C(14)     C(11)     C(12)     174.8(2)   . . . . yes

 O(3)      C(14)     C(13)     C(5)      161.8(3)   . . . . yes

 O(3)      C(14)     C(13)     C(6)      163.3(3)   . . . . yes

 O(3)      C(14)     C(13)     C(8)      170.9(5)   . . . . yes

 O(3)      C(14)     C(13)     C(9)      -9.6(2)    . . . . yes

 O(3)      C(14)     C(13)     C(10)     -16.7(5)   . . . . yes

 O(3)      C(14)     C(13)     C(12)     -16.8(4)   . . . . yes

 O(4)      P(1)      O(3)      O(5)      -123.5(2)  . . . . yes

 O(4)      P(1)      O(3)      O(6)      127.3(2)   . . . . yes

 O(4)      P(1)      O(3)      C(9)      30.0(2)    . . . . yes

 O(4)      P(1)      O(3)      C(11)     -3.5(2)    . . . . yes

 O(4)      P(1)      O(3)      C(14)     67.1(2)    . . . . yes

 O(4)      P(1)      O(5)      O(6)      -127.2(2)  . . . . yes

 O(4)      P(1)      O(5)      C(17)     -176.0(3)  . . . . yes

 O(4)      P(1)      O(5)      C(18)     145.2(4)   . . . . yes

 O(4)      P(1)      O(6)      O(5)      124.5(2)   . . . . yes

 O(4)      P(1)      O(6)      C(19)     54.4(4)    . . . . yes

 O(4)      P(1)      O(6)      C(20)     77.0(5)    . . . . yes

 O(4)      P(1)      C(9)      C(1)      -57.9(1)   . . . . yes

 O(4)      P(1)      C(9)      C(8)      128.0(1)   . . . . yes

 O(4)      P(1)      C(9)      C(11)     -41.3(2)   . . . . yes

 O(4)      P(1)      C(9)      C(12)     -14.7(2)   . . . . yes

 O(4)      P(1)      C(9)      C(13)     75.3(2)    . . . . yes

 O(4)      P(1)      C(9)      C(14)     108.5(2)   . . . . yes

 O(4)      P(1)      C(17)     O(5)      5.7(5)     . . . . yes

 O(4)      P(1)      C(17)     C(18)     54.5(6)    . . . . yes

 O(4)      P(1)      C(19)     O(6)      -132.6(4)  . . . . yes

 O(4)      P(1)      C(19)     C(20)     -159.4(7)  . . . . yes

 O(4)      O(3)      P(1)      O(5)      123.5(2)   . . . . yes

 O(4)      O(3)      P(1)      O(6)      -127.3(2)  . . . . yes

 O(4)      O(3)      P(1)      C(9)      -30.0(2)   . . . . yes

 O(4)      O(3)      P(1)      C(17)     146.6(2)   . . . . yes

 O(4)      O(3)      P(1)      C(19)     -128.7(3)  . . . . yes

 O(4)      O(3)      O(1)      C(1)      89.0(2)    . . . . yes

 O(4)      O(3)      O(1)      C(2)      87.2(2)    . . . . yes

 O(4)      O(3)      O(1)      C(11)     92.8(1)    . . . . yes

 O(4)      O(3)      O(1)      C(15)     -57.0(4)   . . . . yes

 O(4)      O(3)      O(2)      C(7)      -69.4(2)   . . . . yes

 O(4)      O(3)      O(2)      C(8)      -76.0(2)   . . . . yes

 O(4)      O(3)      O(2)      C(14)     -85.9(1)   . . . . yes

 O(4)      O(3)      O(2)      C(16)     67.1(5)    . . . . yes

 O(4)      O(3)      O(5)      O(6)      -72.1(1)   . . . . yes

 O(4)      O(3)      O(5)      C(17)     -163.4(3)  . . . . yes

 O(4)      O(3)      O(5)      C(18)     161.6(2)   . . . . yes

 O(4)      O(3)      O(6)      O(5)      68.27(10)  . . . . yes

 O(4)      O(3)      O(6)      C(19)     32(1)      . . . . yes

 O(4)      O(3)      O(6)      C(20)     166.0(6)   . . . . yes

 O(4)      O(3)      C(9)      C(1)      -69.7(1)   . . . . yes

 O(4)      O(3)      C(9)      C(8)      118.1(1)   . . . . yes

 O(4)      O(3)      C(9)      C(11)     -67.2(2)   . . . . yes

 O(4)      O(3)      C(9)      C(12)     -61.2(4)   . . . . yes

 O(4)      O(3)      C(9)      C(13)     102.8(3)   . . . . yes

 O(4)      O(3)      C(9)      C(14)     113.2(2)   . . . . yes

 O(4)      O(3)      C(11)     C(1)      -71.7(2)   . . . . yes

 O(4)      O(3)      C(11)     C(2)      -69.5(2)   . . . . yes

 O(4)      O(3)      C(11)     C(4)      45(2)      . . . . yes

 O(4)      O(3)      C(11)     C(9)      112.7(2)   . . . . yes

 O(4)      O(3)      C(11)     C(10)     105.3(1)   . . . . yes

 O(4)      O(3)      C(11)     C(12)     103.3(4)   . . . . yes

 O(4)      O(3)      C(11)     C(14)     112.9(1)   . . . . yes

 O(4)      O(3)      C(14)     C(5)      13(1)      . . . . yes

 O(4)      O(3)      C(14)     C(7)      107.9(2)   . . . . yes

 O(4)      O(3)      C(14)     C(8)      115.8(2)   . . . . yes

 O(4)      O(3)      C(14)     C(9)      -72.9(2)   . . . . yes

 O(4)      O(3)      C(14)     C(10)     -65.5(2)   . . . . yes

 O(4)      O(3)      C(14)     C(11)     -73.1(1)   . . . . yes

 O(4)      O(3)      C(14)     C(13)     -56.2(4)   . . . . yes

 O(4)      O(5)      P(1)      O(6)      127.2(2)   . . . . yes

 O(4)      O(5)      P(1)      C(9)      -112.4(2)  . . . . yes

 O(4)      O(5)      P(1)      C(17)     176.0(3)   . . . . yes

 O(4)      O(5)      P(1)      C(19)     100.2(2)   . . . . yes

 O(4)      O(5)      O(3)      O(6)      72.1(1)    . . . . yes

 O(4)      O(5)      O(3)      C(9)      -25.8(4)   . . . . yes

 O(4)      O(5)      O(3)      C(11)     -52.7(2)   . . . . yes

 O(4)      O(5)      O(3)      C(14)     53.9(3)    . . . . yes

 O(4)      O(5)      O(6)      C(19)     94.0(3)    . . . . yes

 O(4)      O(5)      O(6)      C(20)     126.8(2)   . . . . yes

 O(4)      O(5)      C(17)     C(18)     -148.2(6)  . . . . yes

 O(4)      O(5)      C(18)     C(17)     136.8(6)   . . . . yes

 O(4)      O(6)      P(1)      O(5)      -124.5(2)  . . . . yes

 O(4)      O(6)      P(1)      C(9)      100.6(1)   . . . . yes

 O(4)      O(6)      P(1)      C(17)     -145.1(2)  . . . . yes

 O(4)      O(6)      P(1)      C(19)     -54.4(4)   . . . . yes

 O(4)      O(6)      O(3)      O(5)      -68.27(10) . . . . yes

 O(4)      O(6)      O(3)      C(9)      80.3(2)    . . . . yes

 O(4)      O(6)      O(3)      C(11)     46.3(2)    . . . . yes

 O(4)      O(6)      O(3)      C(14)     105.0(1)   . . . . yes

 O(4)      O(6)      O(5)      C(17)     169.6(3)   . . . . yes

 O(4)      O(6)      O(5)      C(18)     162.3(3)   . . . . yes

 O(4)      O(6)      C(19)     C(20)     -173.7(4)  . . . . yes

 O(4)      O(6)      C(20)     C(19)     8.8(6)     . . . . yes

 O(5)      P(1)      O(3)      O(6)      -109.2(2)  . . . . yes

 O(5)      P(1)      O(3)      C(9)      153.5(2)   . . . . yes

 O(5)      P(1)      O(3)      C(11)     120.0(1)   . . . . yes

 O(5)      P(1)      O(3)      C(14)     -169.4(2)  . . . . yes

 O(5)      P(1)      O(4)      O(6)      121.3(2)   . . . . yes

 O(5)      P(1)      O(6)      C(19)     -70.1(4)   . . . . yes

 O(5)      P(1)      O(6)      C(20)     -47.5(5)   . . . . yes

 O(5)      P(1)      C(9)      C(1)      62.8(2)    . . . . yes

 O(5)      P(1)      C(9)      C(8)      -111.3(2)  . . . . yes

 O(5)      P(1)      C(9)      C(11)     79.3(2)    . . . . yes

 O(5)      P(1)      C(9)      C(12)     105.9(2)   . . . . yes

 O(5)      P(1)      C(9)      C(13)     -164.0(2)  . . . . yes

 O(5)      P(1)      C(9)      C(14)     -130.9(2)  . . . . yes

 O(5)      P(1)      C(17)     C(18)     48.8(5)    . . . . yes

 O(5)      P(1)      C(19)     O(6)      114.7(4)   . . . . yes

 O(5)      P(1)      C(19)     C(20)     87.8(7)    . . . . yes

 O(5)      O(3)      P(1)      O(6)      109.2(2)   . . . . yes

 O(5)      O(3)      P(1)      C(9)      -153.5(2)  . . . . yes

 O(5)      O(3)      P(1)      C(17)     23.1(1)    . . . . yes

 O(5)      O(3)      P(1)      C(19)     107.8(2)   . . . . yes

 O(5)      O(3)      O(1)      C(1)      150.2(2)   . . . . yes

 O(5)      O(3)      O(1)      C(2)      148.4(2)   . . . . yes

 O(5)      O(3)      O(1)      C(11)     154.0(1)   . . . . yes

 O(5)      O(3)      O(1)      C(15)     4.2(4)     . . . . yes

 O(5)      O(3)      O(2)      C(7)      -139.5(2)  . . . . yes

 O(5)      O(3)      O(2)      C(8)      -146.1(2)  . . . . yes

 O(5)      O(3)      O(2)      C(14)     -155.9(1)  . . . . yes

 O(5)      O(3)      O(2)      C(16)     -3.0(5)    . . . . yes

 O(5)      O(3)      O(4)      O(6)      71.8(1)    . . . . yes

 O(5)      O(3)      O(6)      C(19)     -35(1)     . . . . yes

 O(5)      O(3)      O(6)      C(20)     97.8(6)    . . . . yes

 O(5)      O(3)      C(9)      C(1)      -47.7(4)   . . . . yes

 O(5)      O(3)      C(9)      C(8)      140.1(3)   . . . . yes

 O(5)      O(3)      C(9)      C(11)     -45.2(5)   . . . . yes

 O(5)      O(3)      C(9)      C(12)     -39.2(6)   . . . . yes

 O(5)      O(3)      C(9)      C(13)     124.8(4)   . . . . yes

 O(5)      O(3)      C(9)      C(14)     135.2(3)   . . . . yes

 O(5)      O(3)      C(11)     C(1)      -28.4(2)   . . . . yes

 O(5)      O(3)      C(11)     C(2)      -26.3(2)   . . . . yes

 O(5)      O(3)      C(11)     C(4)      89(2)      . . . . yes

 O(5)      O(3)      C(11)     C(9)      156.0(3)   . . . . yes

 O(5)      O(3)      C(11)     C(10)     148.6(2)   . . . . yes

 O(5)      O(3)      C(11)     C(12)     146.5(4)   . . . . yes

 O(5)      O(3)      C(11)     C(14)     156.2(2)   . . . . yes

 O(5)      O(3)      C(14)     C(5)      -32(1)     . . . . yes

 O(5)      O(3)      C(14)     C(7)      61.5(4)    . . . . yes

 O(5)      O(3)      C(14)     C(8)      69.4(4)    . . . . yes

 O(5)      O(3)      C(14)     C(9)      -119.2(4)  . . . . yes

 O(5)      O(3)      C(14)     C(10)     -111.8(3)  . . . . yes

 O(5)      O(3)      C(14)     C(11)     -119.5(3)  . . . . yes

 O(5)      O(3)      C(14)     C(13)     -102.5(5)  . . . . yes

 O(5)      O(4)      P(1)      O(6)      -121.3(2)  . . . . yes

 O(5)      O(4)      P(1)      C(9)      132.2(1)   . . . . yes

 O(5)      O(4)      P(1)      C(17)     -2.8(2)    . . . . yes

 O(5)      O(4)      P(1)      C(19)     -98.0(2)   . . . . yes

 O(5)      O(4)      O(3)      O(6)      -71.8(1)   . . . . yes

 O(5)      O(4)      O(3)      C(9)      168.4(2)   . . . . yes

 O(5)      O(4)      O(3)      C(11)     140.1(1)   . . . . yes

 O(5)      O(4)      O(3)      C(14)     -161.7(1)  . . . . yes

 O(5)      O(4)      O(6)      C(19)     -98.9(3)   . . . . yes

 O(5)      O(4)      O(6)      C(20)     -104.0(3)  . . . . yes

 O(5)      O(6)      P(1)      C(9)      -134.9(1)  . . . . yes

 O(5)      O(6)      P(1)      C(17)     -20.6(1)   . . . . yes

 O(5)      O(6)      P(1)      C(19)     70.1(4)    . . . . yes

 O(5)      O(6)      O(3)      C(9)      148.6(2)   . . . . yes

 O(5)      O(6)      O(3)      C(11)     114.6(2)   . . . . yes

 O(5)      O(6)      O(3)      C(14)     173.3(1)   . . . . yes

 O(5)      O(6)      C(19)     C(20)     126.2(4)   . . . . yes

 O(5)      O(6)      C(20)     C(19)     -66.4(6)   . . . . yes

 O(5)      C(17)     P(1)      O(6)      133.5(3)   . . . . yes

 O(5)      C(17)     P(1)      C(9)      -123.6(3)  . . . . yes

 O(5)      C(17)     P(1)      C(19)     104.6(3)   . . . . yes

 O(6)      P(1)      O(3)      C(9)      -97.2(2)   . . . . yes

 O(6)      P(1)      O(3)      C(11)     -130.8(2)  . . . . yes

 O(6)      P(1)      O(3)      C(14)     -60.1(2)   . . . . yes

 O(6)      P(1)      O(5)      C(17)     -48.8(3)   . . . . yes

 O(6)      P(1)      O(5)      C(18)     -87.6(4)   . . . . yes

 O(6)      P(1)      C(9)      C(1)      -175.8(1)  . . . . yes

 O(6)      P(1)      C(9)      C(8)      10.1(2)    . . . . yes

 O(6)      P(1)      C(9)      C(11)     -159.2(2)  . . . . yes

 O(6)      P(1)      C(9)      C(12)     -132.6(2)  . . . . yes

 O(6)      P(1)      C(9)      C(13)     -42.6(2)   . . . . yes

 O(6)      P(1)      C(9)      C(14)     -9.4(2)    . . . . yes

 O(6)      P(1)      C(17)     C(18)     -177.7(5)  . . . . yes

 O(6)      P(1)      C(19)     C(20)     -26.9(5)   . . . . yes

 O(6)      O(3)      P(1)      C(9)      97.2(2)    . . . . yes

 O(6)      O(3)      P(1)      C(17)     -86.2(2)   . . . . yes

 O(6)      O(3)      P(1)      C(19)     -1.4(2)    . . . . yes

 O(6)      O(3)      O(1)      C(1)      118.3(2)   . . . . yes

 O(6)      O(3)      O(1)      C(2)      116.5(2)   . . . . yes

 O(6)      O(3)      O(1)      C(11)     122.1(2)   . . . . yes

 O(6)      O(3)      O(1)      C(15)     -27.7(5)   . . . . yes

 O(6)      O(3)      O(2)      C(7)      -96.0(2)   . . . . yes

 O(6)      O(3)      O(2)      C(8)      -102.6(2)  . . . . yes

 O(6)      O(3)      O(2)      C(14)     -112.5(1)  . . . . yes

 O(6)      O(3)      O(2)      C(16)     40.5(5)    . . . . yes

 O(6)      O(3)      O(5)      C(17)     -91.3(3)   . . . . yes

 O(6)      O(3)      O(5)      C(18)     -126.3(2)  . . . . yes

 O(6)      O(3)      C(9)      C(1)      -130.1(1)  . . . . yes

 O(6)      O(3)      C(9)      C(8)      57.7(2)    . . . . yes

 O(6)      O(3)      C(9)      C(11)     -127.6(2)  . . . . yes

 O(6)      O(3)      C(9)      C(12)     -121.6(3)  . . . . yes

 O(6)      O(3)      C(9)      C(13)     42.4(4)    . . . . yes

 O(6)      O(3)      C(9)      C(14)     52.8(3)    . . . . yes

 O(6)      O(3)      C(11)     C(1)      -111.3(2)  . . . . yes

 O(6)      O(3)      C(11)     C(2)      -109.2(2)  . . . . yes

 O(6)      O(3)      C(11)     C(4)      6(2)       . . . . yes

 O(6)      O(3)      C(11)     C(9)      73.0(3)    . . . . yes

 O(6)      O(3)      C(11)     C(10)     65.7(2)    . . . . yes

 O(6)      O(3)      C(11)     C(12)     63.6(4)    . . . . yes

 O(6)      O(3)      C(11)     C(14)     73.3(2)    . . . . yes

 O(6)      O(3)      C(14)     C(5)      -48(1)     . . . . yes

 O(6)      O(3)      C(14)     C(7)      45.5(2)    . . . . yes

 O(6)      O(3)      C(14)     C(8)      53.4(2)    . . . . yes

 O(6)      O(3)      C(14)     C(9)      -135.3(2)  . . . . yes

 O(6)      O(3)      C(14)     C(10)     -127.9(2)  . . . . yes

 O(6)      O(3)      C(14)     C(11)     -135.5(1)  . . . . yes

 O(6)      O(3)      C(14)     C(13)     -118.5(4)  . . . . yes

 O(6)      O(4)      P(1)      C(9)      -106.5(1)  . . . . yes

 O(6)      O(4)      P(1)      C(17)     118.5(3)   . . . . yes

 O(6)      O(4)      P(1)      C(19)     23.3(2)    . . . . yes

 O(6)      O(4)      O(3)      C(9)      -119.8(2)  . . . . yes

 O(6)      O(4)      O(3)      C(11)     -148.1(1)  . . . . yes

 O(6)      O(4)      O(3)      C(14)     -89.9(1)   . . . . yes

 O(6)      O(4)      O(5)      C(17)     -25.3(7)   . . . . yes

 O(6)      O(4)      O(5)      C(18)     -134.3(6)  . . . . yes

 O(6)      O(5)      P(1)      C(9)      120.4(2)   . . . . yes

 O(6)      O(5)      P(1)      C(17)     48.8(3)    . . . . yes

 O(6)      O(5)      P(1)      C(19)     -27.0(1)   . . . . yes

 O(6)      O(5)      O(3)      C(9)      -97.8(4)   . . . . yes

 O(6)      O(5)      O(3)      C(11)     -124.7(2)  . . . . yes

 O(6)      O(5)      O(3)      C(14)     -18.2(3)   . . . . yes

 O(6)      O(5)      C(17)     C(18)     -170.5(4)  . . . . yes

 O(6)      O(5)      C(18)     C(17)     12.5(5)    . . . . yes

 O(6)      C(19)     P(1)      C(9)      -31.8(5)   . . . . yes

 O(6)      C(19)     P(1)      C(17)     87.8(4)    . . . . yes

 C(1)      O(1)      O(3)      C(9)      -7.8(2)    . . . . yes

 C(1)      O(1)      O(3)      C(11)     -3.8(2)    . . . . yes

 C(1)      O(1)      O(3)      C(14)     -12.0(2)   . . . . yes

 C(1)      O(1)      C(2)      C(3)      4.2(6)     . . . . yes

 C(1)      O(1)      C(2)      C(4)      3.6(3)     . . . . yes

 C(1)      O(1)      C(2)      C(11)     1.7(3)     . . . . yes

 C(1)      O(1)      C(11)     C(2)      -1.5(2)    . . . . yes

 C(1)      O(1)      C(11)     C(4)      -3.2(3)    . . . . yes

 C(1)      O(1)      C(11)     C(9)      177.1(3)   . . . . yes

 C(1)      O(1)      C(11)     C(10)     -16(3)     . . . . yes

 C(1)      O(1)      C(11)     C(12)     -5.5(4)    . . . . yes

 C(1)      O(1)      C(11)     C(14)     -178.6(3)  . . . . yes

 C(1)      C(2)      O(1)      C(11)     -1.7(3)    . . . . yes

 C(1)      C(2)      O(1)      C(15)     163.8(4)   . . . . yes

 C(1)      C(2)      C(3)      C(4)      1.2(6)     . . . . yes

 C(1)      C(2)      C(3)      C(12)     0.7(4)     . . . . yes

 C(1)      C(2)      C(4)      C(3)      -179.0(5)  . . . . yes

 C(1)      C(2)      C(4)      C(10)     -1.1(3)    . . . . yes

 C(1)      C(2)      C(4)      C(11)     -0.1(2)    . . . . yes

 C(1)      C(2)      C(4)      C(12)     0.2(3)     . . . . yes

 C(1)      C(2)      C(11)     C(4)      179.7(3)   . . . . yes

 C(1)      C(2)      C(11)     C(9)      -1.8(5)    . . . . yes

 C(1)      C(2)      C(11)     C(10)     -179.3(3)  . . . . yes

 C(1)      C(2)      C(11)     C(12)     179.4(4)   . . . . yes

 C(1)      C(2)      C(11)     C(14)     139(2)     . . . . yes

 C(1)      C(3)      C(2)      C(4)      -1.2(6)    . . . . yes

 C(1)      C(3)      C(2)      C(11)     -0.2(3)    . . . . yes

 C(1)      C(3)      C(4)      C(2)      0.6(3)     . . . . yes

 C(1)      C(3)      C(4)      C(10)     -3.1(7)    . . . . yes

 C(1)      C(3)      C(4)      C(11)     -0.4(2)    . . . . yes

 C(1)      C(3)      C(4)      C(12)     -0.4(4)    . . . . yes

 C(1)      C(3)      C(12)     C(4)      179.5(5)   . . . . yes

 C(1)      C(3)      C(12)     C(9)      -1.2(2)    . . . . yes

 C(1)      C(3)      C(12)     C(10)     -175.7(5)  . . . . yes

 C(1)      C(3)      C(12)     C(11)     -0.5(2)    . . . . yes

 C(1)      C(3)      C(12)     C(13)     -165(4)    . . . . yes

 C(1)      C(9)      P(1)      C(17)     91.9(2)    . . . . yes

 C(1)      C(9)      P(1)      C(19)     -160.6(2)  . . . . yes

 C(1)      C(9)      O(3)      C(11)     -2.5(2)    . . . . yes

 C(1)      C(9)      O(3)      C(14)     177.1(3)   . . . . yes

 C(1)      C(9)      C(8)      C(6)      95(1)      . . . . yes

 C(1)      C(9)      C(8)      C(7)      100(1)     . . . . yes

 C(1)      C(9)      C(8)      C(13)     86(1)      . . . . yes

 C(1)      C(9)      C(8)      C(14)     87(1)      . . . . yes

 C(1)      C(9)      C(8)      C(16)     -90(1)     . . . . yes

 C(1)      C(9)      C(11)     C(2)      1.1(3)     . . . . yes

 C(1)      C(9)      C(11)     C(4)      178.7(6)   . . . . yes

 C(1)      C(9)      C(11)     C(10)     178.8(3)   . . . . yes

 C(1)      C(9)      C(11)     C(12)     179.7(4)   . . . . yes

 C(1)      C(9)      C(11)     C(14)     -174.2(2)  . . . . yes

 C(1)      C(9)      C(12)     C(3)      1.1(2)     . . . . yes

 C(1)      C(9)      C(12)     C(4)      1.8(5)     . . . . yes

 C(1)      C(9)      C(12)     C(10)     178.3(2)   . . . . yes

 C(1)      C(9)      C(12)     C(11)     -0.2(2)    . . . . yes

 C(1)      C(9)      C(12)     C(13)     -179.5(1)  . . . . yes

 C(1)      C(9)      C(13)     C(5)      174.0(4)   . . . . yes

 C(1)      C(9)      C(13)     C(6)      -179.4(2)  . . . . yes

 C(1)      C(9)      C(13)     C(8)      -170.9(2)  . . . . yes

 C(1)      C(9)      C(13)     C(10)     2.6(2)     . . . . yes

 C(1)      C(9)      C(13)     C(12)     0.5(1)     . . . . yes

 C(1)      C(9)      C(13)     C(14)     -171.2(3)  . . . . yes

 C(1)      C(9)      C(14)     C(5)      24.1(6)    . . . . yes

 C(1)      C(9)      C(14)     C(7)      -172.7(3)  . . . . yes

 C(1)      C(9)      C(14)     C(8)      -163.5(3)  . . . . yes

 C(1)      C(9)      C(14)     C(10)     12.4(4)    . . . . yes

 C(1)      C(9)      C(14)     C(11)     5.5(2)     . . . . yes

 C(1)      C(9)      C(14)     C(13)     16.0(5)    . . . . yes

 C(1)      C(11)     O(1)      C(2)      1.5(2)     . . . . yes

 C(1)      C(11)     O(1)      C(15)     -27.6(5)   . . . . yes

 C(1)      C(11)     O(3)      C(9)      175.6(3)   . . . . yes

 C(1)      C(11)     O(3)      C(14)     175.4(2)   . . . . yes

 C(1)      C(11)     C(2)      C(3)      179.7(4)   . . . . yes

 C(1)      C(11)     C(2)      C(4)      -179.7(3)  . . . . yes

 C(1)      C(11)     C(4)      C(2)      0.1(2)     . . . . yes

 C(1)      C(11)     C(4)      C(3)      0.7(3)     . . . . yes

 C(1)      C(11)     C(4)      C(10)     179.1(2)   . . . . yes

 C(1)      C(11)     C(4)      C(12)     -179.3(4)  . . . . yes

 C(1)      C(11)     C(9)      C(8)      163.9(3)   . . . . yes

 C(1)      C(11)     C(9)      C(12)     -179.7(4)  . . . . yes

 C(1)      C(11)     C(9)      C(13)     179.8(2)   . . . . yes

 C(1)      C(11)     C(9)      C(14)     174.2(2)   . . . . yes

 C(1)      C(11)     C(10)     C(4)      -1.6(4)    . . . . yes

 C(1)      C(11)     C(10)     C(5)      178.5(3)   . . . . yes

 C(1)      C(11)     C(10)     C(12)     -3.2(4)    . . . . yes

 C(1)      C(11)     C(10)     C(13)     -179.3(3)  . . . . yes

 C(1)      C(11)     C(10)     C(14)     -177.9(4)  . . . . yes

 C(1)      C(11)     C(12)     C(3)      0.8(3)     . . . . yes

 C(1)      C(11)     C(12)     C(4)      0.8(4)     . . . . yes

 C(1)      C(11)     C(12)     C(9)      179.7(4)   . . . . yes

 C(1)      C(11)     C(12)     C(10)     178.0(3)   . . . . yes

 C(1)      C(11)     C(12)     C(13)     -179.7(2)  . . . . yes

 C(1)      C(11)     C(14)     C(5)      -179.1(4)  . . . . yes

 C(1)      C(11)     C(14)     C(7)      148(4)     . . . . yes

 C(1)      C(11)     C(14)     C(8)      9.1(7)     . . . . yes

 C(1)      C(11)     C(14)     C(9)      -10.6(4)   . . . . yes

 C(1)      C(11)     C(14)     C(10)     177.4(5)   . . . . yes

 C(1)      C(11)     C(14)     C(13)     178.7(4)   . . . . yes

 C(1)      C(12)     C(3)      C(2)      -0.4(2)    . . . . yes

 C(1)      C(12)     C(3)      C(4)      -179.5(5)  . . . . yes

 C(1)      C(12)     C(4)      C(2)      -0.1(2)    . . . . yes

 C(1)      C(12)     C(4)      C(3)      0.4(4)     . . . . yes

 C(1)      C(12)     C(4)      C(10)     177.5(3)   . . . . yes

 C(1)      C(12)     C(4)      C(11)     0.4(2)     . . . . yes

 C(1)      C(12)     C(9)      C(8)      170.9(2)   . . . . yes

 C(1)      C(12)     C(9)      C(11)     0.2(2)     . . . . yes

 C(1)      C(12)     C(9)      C(13)     179.5(1)   . . . . yes

 C(1)      C(12)     C(9)      C(14)     175.1(2)   . . . . yes

 C(1)      C(12)     C(10)     C(4)      -175.0(7)  . . . . yes

 C(1)      C(12)     C(10)     C(5)      5.4(9)     . . . . yes

 C(1)      C(12)     C(10)     C(11)     2.1(3)     . . . . yes

 C(1)      C(12)     C(10)     C(13)     6.9(7)     . . . . yes

 C(1)      C(12)     C(10)     C(14)     6.8(5)     . . . . yes

 C(1)      C(12)     C(11)     C(2)      -0.3(2)    . . . . yes

 C(1)      C(12)     C(11)     C(4)      -0.8(4)    . . . . yes

 C(1)      C(12)     C(11)     C(9)      -179.7(4)  . . . . yes

 C(1)      C(12)     C(11)     C(10)     -178.0(3)  . . . . yes

 C(1)      C(12)     C(11)     C(14)     177.4(3)   . . . . yes

 C(1)      C(12)     C(13)     C(5)      -173.6(4)  . . . . yes

 C(1)      C(12)     C(13)     C(6)      173(12)    . . . . yes

 C(1)      C(12)     C(13)     C(8)      8.5(3)     . . . . yes

 C(1)      C(12)     C(13)     C(9)      -0.5(2)    . . . . yes

 C(1)      C(12)     C(13)     C(10)     -176.0(4)  . . . . yes

 C(1)      C(12)     C(13)     C(14)     3.8(2)     . . . . yes

 C(1)      C(15)     O(1)      C(2)      -8.7(2)    . . . . yes

 C(1)      C(15)     O(1)      C(11)     16.6(3)    . . . . yes

 C(2)      O(1)      O(3)      C(9)      -9.6(2)    . . . . yes

 C(2)      O(1)      O(3)      C(11)     -5.5(1)    . . . . yes

 C(2)      O(1)      O(3)      C(14)     -13.8(2)   . . . . yes

 C(2)      O(1)      C(1)      C(3)      -2.7(4)    . . . . yes

 C(2)      O(1)      C(1)      C(9)      -178.9(3)  . . . . yes

 C(2)      O(1)      C(1)      C(11)     -177.3(4)  . . . . yes

 C(2)      O(1)      C(1)      C(12)     -174.0(6)  . . . . yes

 C(2)      O(1)      C(1)      C(15)     18.4(5)    . . . . yes

 C(2)      O(1)      C(11)     C(4)      -1.7(2)    . . . . yes

 C(2)      O(1)      C(11)     C(9)      178.6(2)   . . . . yes

 C(2)      O(1)      C(11)     C(10)     -15(3)     . . . . yes

 C(2)      O(1)      C(11)     C(12)     -4.0(4)    . . . . yes

 C(2)      O(1)      C(11)     C(14)     -177.1(2)  . . . . yes

 C(2)      C(1)      O(1)      C(11)     177.3(4)   . . . . yes

 C(2)      C(1)      O(1)      C(15)     -18.4(5)   . . . . yes

 C(2)      C(1)      C(3)      C(4)      -179.0(5)  . . . . yes

 C(2)      C(1)      C(3)      C(12)     -179.2(4)  . . . . yes

 C(2)      C(1)      C(9)      C(8)      -84(1)     . . . . yes

 C(2)      C(1)      C(9)      C(11)     -1.5(5)    . . . . yes

 C(2)      C(1)      C(9)      C(12)     -1.3(4)    . . . . yes

 C(2)      C(1)      C(9)      C(13)     -1.8(5)    . . . . yes

 C(2)      C(1)      C(9)      C(14)     -11.4(7)   . . . . yes

 C(2)      C(1)      C(11)     C(4)      -0.2(3)    . . . . yes

 C(2)      C(1)      C(11)     C(9)      179.1(3)   . . . . yes

 C(2)      C(1)      C(11)     C(10)     1.1(5)     . . . . yes

 C(2)      C(1)      C(11)     C(12)     -0.6(4)    . . . . yes

 C(2)      C(1)      C(11)     C(14)     -174.8(4)  . . . . yes

 C(2)      C(1)      C(12)     C(3)      0.4(2)     . . . . yes

 C(2)      C(1)      C(12)     C(4)      0.2(3)     . . . . yes

 C(2)      C(1)      C(12)     C(9)      179.3(2)   . . . . yes

 C(2)      C(1)      C(12)     C(10)     175.9(5)   . . . . yes

 C(2)      C(1)      C(12)     C(11)     179.4(3)   . . . . yes

 C(2)      C(1)      C(12)     C(13)     179.8(2)   . . . . yes

 C(2)      C(3)      C(1)      C(9)      -179.7(4)  . . . . yes

 C(2)      C(3)      C(1)      C(11)     179.7(4)   . . . . yes

 C(2)      C(3)      C(1)      C(12)     179.2(4)   . . . . yes

 C(2)      C(3)      C(1)      C(15)     -8.3(4)    . . . . yes

 C(2)      C(3)      C(4)      C(10)     -3.7(9)    . . . . yes

 C(2)      C(3)      C(4)      C(11)     -1.0(4)    . . . . yes

 C(2)      C(3)      C(4)      C(12)     -1.0(7)    . . . . yes

 C(2)      C(3)      C(12)     C(4)      179.2(6)   . . . . yes

 C(2)      C(3)      C(12)     C(9)      -1.5(3)    . . . . yes

 C(2)      C(3)      C(12)     C(10)     -176.1(5)  . . . . yes

 C(2)      C(3)      C(12)     C(11)     -0.9(3)    . . . . yes

 C(2)      C(3)      C(12)     C(13)     -165(4)    . . . . yes

 C(2)      C(4)      C(3)      C(12)     1.0(7)     . . . . yes

 C(2)      C(4)      C(10)     C(5)      178(4)     . . . . yes

 C(2)      C(4)      C(10)     C(11)     1.0(2)     . . . . yes

 C(2)      C(4)      C(10)     C(12)     2.7(3)     . . . . yes

 C(2)      C(4)      C(10)     C(13)     6.1(7)     . . . . yes

 C(2)      C(4)      C(10)     C(14)     4.8(3)     . . . . yes

 C(2)      C(4)      C(11)     C(9)      -178.8(4)  . . . . yes

 C(2)      C(4)      C(11)     C(10)     -179.0(2)  . . . . yes

 C(2)      C(4)      C(11)     C(12)     179.4(4)   . . . . yes

 C(2)      C(4)      C(11)     C(14)     177.4(2)   . . . . yes

 C(2)      C(4)      C(12)     C(3)      -0.5(3)    . . . . yes

 C(2)      C(4)      C(12)     C(9)      -1.7(5)    . . . . yes

 C(2)      C(4)      C(12)     C(10)     -177.6(3)  . . . . yes

 C(2)      C(4)      C(12)     C(11)     -0.5(3)    . . . . yes

 C(2)      C(4)      C(12)     C(13)     -179.4(4)  . . . . yes

 C(2)      C(11)     O(1)      C(15)     -29.1(5)   . . . . yes

 C(2)      C(11)     O(3)      C(9)      177.8(3)   . . . . yes

 C(2)      C(11)     O(3)      C(14)     177.6(2)   . . . . yes

 C(2)      C(11)     C(1)      C(3)      -0.2(2)    . . . . yes

 C(2)      C(11)     C(1)      C(9)      -179.1(3)  . . . . yes

 C(2)      C(11)     C(1)      C(12)     0.6(4)     . . . . yes

 C(2)      C(11)     C(1)      C(15)     -167.8(6)  . . . . yes

 C(2)      C(11)     C(4)      C(3)      0.6(2)     . . . . yes

 C(2)      C(11)     C(4)      C(10)     179.0(2)   . . . . yes

 C(2)      C(11)     C(4)      C(12)     -179.4(4)  . . . . yes

 C(2)      C(11)     C(9)      C(8)      164.9(3)   . . . . yes

 C(2)      C(11)     C(9)      C(12)     -178.6(6)  . . . . yes

 C(2)      C(11)     C(9)      C(13)     -179.2(4)  . . . . yes

 C(2)      C(11)     C(9)      C(14)     175.3(4)   . . . . yes

 C(2)      C(11)     C(10)     C(4)      -0.9(2)    . . . . yes

 C(2)      C(11)     C(10)     C(5)      179.2(2)   . . . . yes

 C(2)      C(11)     C(10)     C(12)     -2.6(3)    . . . . yes

 C(2)      C(11)     C(10)     C(13)     -178.6(2)  . . . . yes

 C(2)      C(11)     C(10)     C(14)     -177.3(2)  . . . . yes

 C(2)      C(11)     C(12)     C(3)      0.5(2)     . . . . yes

 C(2)      C(11)     C(12)     C(4)      0.5(3)     . . . . yes

 C(2)      C(11)     C(12)     C(9)      179.4(3)   . . . . yes

 C(2)      C(11)     C(12)     C(10)     177.7(3)   . . . . yes

 C(2)      C(11)     C(12)     C(13)     180.0(1)   . . . . yes

 C(2)      C(11)     C(14)     C(5)      45(2)      . . . . yes

 C(2)      C(11)     C(14)     C(7)      13(6)      . . . . yes

 C(2)      C(11)     C(14)     C(8)      -126(2)    . . . . yes

 C(2)      C(11)     C(14)     C(9)      -145(2)    . . . . yes

 C(2)      C(11)     C(14)     C(10)     42(2)      . . . . yes

 C(2)      C(11)     C(14)     C(13)     43(2)      . . . . yes

 C(3)      C(1)      O(1)      C(11)     174.6(6)   . . . . yes

 C(3)      C(1)      O(1)      C(15)     -21.1(6)   . . . . yes

 C(3)      C(1)      C(2)      C(4)      0.6(3)     . . . . yes

 C(3)      C(1)      C(2)      C(11)     0.3(5)     . . . . yes

 C(3)      C(1)      C(9)      C(8)      -83(1)     . . . . yes

 C(3)      C(1)      C(9)      C(11)     -1.3(3)    . . . . yes

 C(3)      C(1)      C(9)      C(12)     -1.1(2)    . . . . yes

 C(3)      C(1)      C(9)      C(13)     -1.5(2)    . . . . yes

 C(3)      C(1)      C(9)      C(14)     -11.2(5)   . . . . yes

 C(3)      C(1)      C(11)     C(4)      -0.4(2)    . . . . yes

 C(3)      C(1)      C(11)     C(9)      178.9(3)   . . . . yes

 C(3)      C(1)      C(11)     C(10)     1.0(4)     . . . . yes

 C(3)      C(1)      C(11)     C(12)     -0.8(3)    . . . . yes

 C(3)      C(1)      C(11)     C(14)     -174.9(4)  . . . . yes

 C(3)      C(1)      C(12)     C(4)      -0.2(2)    . . . . yes

 C(3)      C(1)      C(12)     C(9)      178.9(2)   . . . . yes

 C(3)      C(1)      C(12)     C(10)     175.5(5)   . . . . yes

 C(3)      C(1)      C(12)     C(11)     179.1(3)   . . . . yes

 C(3)      C(1)      C(12)     C(13)     179.4(2)   . . . . yes

 C(3)      C(2)      O(1)      C(11)     2.5(6)     . . . . yes

 C(3)      C(2)      O(1)      C(15)     168.0(6)   . . . . yes

 C(3)      C(2)      C(1)      C(9)      0.4(7)     . . . . yes

 C(3)      C(2)      C(1)      C(11)     -0.3(5)    . . . . yes

 C(3)      C(2)      C(1)      C(12)     -0.7(4)    . . . . yes

 C(3)      C(2)      C(1)      C(15)     172.9(4)   . . . . yes

 C(3)      C(2)      C(4)      C(10)     177.9(5)   . . . . yes

 C(3)      C(2)      C(4)      C(11)     178.9(5)   . . . . yes

 C(3)      C(2)      C(4)      C(12)     179.2(6)   . . . . yes

 C(3)      C(2)      C(11)     C(4)      -0.6(2)    . . . . yes

 C(3)      C(2)      C(11)     C(9)      177.9(5)   . . . . yes

 C(3)      C(2)      C(11)     C(10)     0.4(3)     . . . . yes

 C(3)      C(2)      C(11)     C(12)     -0.9(3)    . . . . yes

 C(3)      C(2)      C(11)     C(14)     -40(2)     . . . . yes

 C(3)      C(4)      C(2)      C(11)     -178.9(5)  . . . . yes

 C(3)      C(4)      C(10)     C(5)      -179(4)    . . . . yes

 C(3)      C(4)      C(10)     C(11)     3.2(7)     . . . . yes

 C(3)      C(4)      C(10)     C(12)     4.9(6)     . . . . yes

 C(3)      C(4)      C(10)     C(13)     8(1)       . . . . yes

 C(3)      C(4)      C(10)     C(14)     6.9(8)     . . . . yes

 C(3)      C(4)      C(11)     C(9)      -178.2(4)  . . . . yes

 C(3)      C(4)      C(11)     C(10)     -178.4(3)  . . . . yes

 C(3)      C(4)      C(11)     C(12)     180.0(5)   . . . . yes

 C(3)      C(4)      C(11)     C(14)     177.9(3)   . . . . yes

 C(3)      C(4)      C(12)     C(9)      -1.2(8)    . . . . yes

 C(3)      C(4)      C(12)     C(10)     -177.1(4)  . . . . yes

 C(3)      C(4)      C(12)     C(11)     0.0(6)     . . . . yes

 C(3)      C(4)      C(12)     C(13)     -178.9(4)  . . . . yes

 C(3)      C(12)     C(1)      C(9)      -178.9(2)  . . . . yes

 C(3)      C(12)     C(1)      C(11)     -179.1(3)  . . . . yes

 C(3)      C(12)     C(1)      C(15)     -103(1)    . . . . yes

 C(3)      C(12)     C(4)      C(10)     177.1(4)   . . . . yes

 C(3)      C(12)     C(4)      C(11)     0.0(6)     . . . . yes

 C(3)      C(12)     C(9)      C(8)      172.1(2)   . . . . yes

 C(3)      C(12)     C(9)      C(11)     1.3(3)     . . . . yes

 C(3)      C(12)     C(9)      C(13)     -179.3(2)  . . . . yes

 C(3)      C(12)     C(9)      C(14)     176.2(2)   . . . . yes

 C(3)      C(12)     C(10)     C(4)      -2.6(3)    . . . . yes

 C(3)      C(12)     C(10)     C(5)      177.7(3)   . . . . yes

 C(3)      C(12)     C(10)     C(11)     174.5(7)   . . . . yes

 C(3)      C(12)     C(10)     C(13)     179.2(4)   . . . . yes

 C(3)      C(12)     C(10)     C(14)     179.1(4)   . . . . yes

 C(3)      C(12)     C(11)     C(4)      0.0(3)     . . . . yes

 C(3)      C(12)     C(11)     C(9)      -178.9(2)  . . . . yes

 C(3)      C(12)     C(11)     C(10)     -177.2(3)  . . . . yes

 C(3)      C(12)     C(11)     C(14)     178.2(1)   . . . . yes

 C(3)      C(12)     C(13)     C(5)      -8(5)      . . . . yes

 C(3)      C(12)     C(13)     C(6)      -21(15)    . . . . yes

 C(3)      C(12)     C(13)     C(8)      173(4)     . . . . yes

 C(3)      C(12)     C(13)     C(9)      164(4)     . . . . yes

 C(3)      C(12)     C(13)     C(10)     -10(4)     . . . . yes

 C(3)      C(12)     C(13)     C(14)     169(4)     . . . . yes

 C(4)      C(2)      O(1)      C(11)     1.9(2)     . . . . yes

 C(4)      C(2)      O(1)      C(15)     167.4(3)   . . . . yes

 C(4)      C(2)      C(1)      C(9)      1.0(5)     . . . . yes

 C(4)      C(2)      C(1)      C(11)     0.2(3)     . . . . yes

 C(4)      C(2)      C(1)      C(12)     -0.1(2)    . . . . yes

 C(4)      C(2)      C(1)      C(15)     173.5(2)   . . . . yes

 C(4)      C(2)      C(3)      C(12)     -0.5(3)    . . . . yes

 C(4)      C(2)      C(11)     C(9)      178.5(5)   . . . . yes

 C(4)      C(2)      C(11)     C(10)     1.0(2)     . . . . yes

 C(4)      C(2)      C(11)     C(12)     -0.3(2)    . . . . yes

 C(4)      C(2)      C(11)     C(14)     -39(2)     . . . . yes

 C(4)      C(3)      C(1)      C(9)      1.3(3)     . . . . yes

 C(4)      C(3)      C(1)      C(11)     0.7(3)     . . . . yes

 C(4)      C(3)      C(1)      C(12)     0.2(2)     . . . . yes

 C(4)      C(3)      C(1)      C(15)     172.7(3)   . . . . yes

 C(4)      C(3)      C(2)      C(11)     1.0(4)     . . . . yes

 C(4)      C(3)      C(12)     C(9)      179.3(5)   . . . . yes

 C(4)      C(3)      C(12)     C(10)     4.8(6)     . . . . yes

 C(4)      C(3)      C(12)     C(11)     180.0(5)   . . . . yes

 C(4)      C(3)      C(12)     C(13)     14(4)      . . . . yes

 C(4)      C(10)     C(5)      C(6)      -170(4)    . . . . yes

 C(4)      C(10)     C(5)      C(7)      -169(4)    . . . . yes

 C(4)      C(10)     C(5)      C(13)     -172(5)    . . . . yes

 C(4)      C(10)     C(5)      C(14)     -173(5)    . . . . yes

 C(4)      C(10)     C(11)     C(9)      -179.9(2)  . . . . yes

 C(4)      C(10)     C(11)     C(12)     1.7(3)     . . . . yes

 C(4)      C(10)     C(11)     C(14)     176.3(2)   . . . . yes

 C(4)      C(10)     C(12)     C(9)      -178.0(4)  . . . . yes

 C(4)      C(10)     C(12)     C(11)     -177.1(5)  . . . . yes

 C(4)      C(10)     C(12)     C(13)     178.2(3)   . . . . yes

 C(4)      C(10)     C(13)     C(5)      179.4(4)   . . . . yes

 C(4)      C(10)     C(13)     C(6)      177.7(4)   . . . . yes

 C(4)      C(10)     C(13)     C(8)      5.7(9)     . . . . yes

 C(4)      C(10)     C(13)     C(9)      -5.8(6)    . . . . yes

 C(4)      C(10)     C(13)     C(12)     -2.0(4)    . . . . yes

 C(4)      C(10)     C(13)     C(14)     -2.1(7)    . . . . yes

 C(4)      C(10)     C(14)     C(5)      179.7(2)   . . . . yes

 C(4)      C(10)     C(14)     C(7)      175.0(2)   . . . . yes

 C(4)      C(10)     C(14)     C(8)      166.3(3)   . . . . yes

 C(4)      C(10)     C(14)     C(9)      -7.6(2)    . . . . yes

 C(4)      C(10)     C(14)     C(11)     -3.8(2)    . . . . yes

 C(4)      C(10)     C(14)     C(13)     178.9(4)   . . . . yes

 C(4)      C(11)     O(1)      C(15)     -30.8(6)   . . . . yes

 C(4)      C(11)     O(3)      C(9)      -66(2)     . . . . yes

 C(4)      C(11)     O(3)      C(14)     -67(2)     . . . . yes

 C(4)      C(11)     C(1)      C(9)      -179.3(3)  . . . . yes

 C(4)      C(11)     C(1)      C(12)     0.4(2)     . . . . yes

 C(4)      C(11)     C(1)      C(15)     -168.0(4)  . . . . yes

 C(4)      C(11)     C(9)      C(8)      -17.5(7)   . . . . yes

 C(4)      C(11)     C(9)      C(12)     -1.1(3)    . . . . yes

 C(4)      C(11)     C(9)      C(13)     -1.6(4)    . . . . yes

 C(4)      C(11)     C(9)      C(14)     -7.1(5)    . . . . yes

 C(4)      C(11)     C(10)     C(5)      -179.9(2)  . . . . yes

 C(4)      C(11)     C(10)     C(12)     -1.7(3)    . . . . yes

 C(4)      C(11)     C(10)     C(13)     -177.7(3)  . . . . yes

 C(4)      C(11)     C(10)     C(14)     -176.3(2)  . . . . yes

 C(4)      C(11)     C(12)     C(9)      178.9(3)   . . . . yes

 C(4)      C(11)     C(12)     C(10)     177.2(5)   . . . . yes

 C(4)      C(11)     C(12)     C(13)     179.4(4)   . . . . yes

 C(4)      C(11)     C(14)     C(5)      7.2(2)     . . . . yes

 C(4)      C(11)     C(14)     C(7)      -25(4)     . . . . yes

 C(4)      C(11)     C(14)     C(8)      -164.6(4)  . . . . yes

 C(4)      C(11)     C(14)     C(9)      175.6(3)   . . . . yes

 C(4)      C(11)     C(14)     C(10)     3.7(2)     . . . . yes

 C(4)      C(11)     C(14)     C(13)     5.0(2)     . . . . yes

 C(4)      C(12)     C(1)      C(9)      -179.1(2)  . . . . yes

 C(4)      C(12)     C(1)      C(11)     -179.3(4)  . . . . yes

 C(4)      C(12)     C(1)      C(15)     -103(1)    . . . . yes

 C(4)      C(12)     C(9)      C(8)      172.7(5)   . . . . yes

 C(4)      C(12)     C(9)      C(11)     1.9(5)     . . . . yes

 C(4)      C(12)     C(9)      C(13)     -178.7(5)  . . . . yes

 C(4)      C(12)     C(9)      C(14)     176.9(5)   . . . . yes

 C(4)      C(12)     C(10)     C(5)      -179.6(4)  . . . . yes

 C(4)      C(12)     C(10)     C(11)     177.1(5)   . . . . yes

 C(4)      C(12)     C(10)     C(13)     -178.2(3)  . . . . yes

 C(4)      C(12)     C(10)     C(14)     -178.2(3)  . . . . yes

 C(4)      C(12)     C(11)     C(9)      -178.9(3)  . . . . yes

 C(4)      C(12)     C(11)     C(10)     -177.2(5)  . . . . yes

 C(4)      C(12)     C(11)     C(14)     178.2(3)   . . . . yes

 C(4)      C(12)     C(13)     C(5)      5.5(8)     . . . . yes

 C(4)      C(12)     C(13)     C(6)      -7(12)     . . . . yes

 C(4)      C(12)     C(13)     C(8)      -172.3(5)  . . . . yes

 C(4)      C(12)     C(13)     C(9)      178.7(5)   . . . . yes

 C(4)      C(12)     C(13)     C(10)     3.1(6)     . . . . yes

 C(4)      C(12)     C(13)     C(14)     -177.0(5)  . . . . yes

 C(5)      C(6)      C(7)      C(8)      -3.9(6)    . . . . yes

 C(5)      C(6)      C(7)      C(14)     -5.1(4)    . . . . yes

 C(5)      C(6)      C(8)      C(7)      176.7(5)   . . . . yes

 C(5)      C(6)      C(8)      C(9)      -9.0(3)    . . . . yes

 C(5)      C(6)      C(8)      C(13)     -0.8(2)    . . . . yes

 C(5)      C(6)      C(8)      C(14)     -5.4(3)    . . . . yes

 C(5)      C(6)      C(8)      C(16)     177.2(3)   . . . . yes

 C(5)      C(6)      C(13)     C(8)      178.4(4)   . . . . yes

 C(5)      C(6)      C(13)     C(9)      -172.8(4)  . . . . yes

 C(5)      C(6)      C(13)     C(10)     3.0(6)     . . . . yes

 C(5)      C(6)      C(13)     C(12)     13(12)     . . . . yes

 C(5)      C(6)      C(13)     C(14)     -177.1(4)  . . . . yes

 C(5)      C(7)      O(2)      C(8)      -8.4(3)    . . . . yes

 C(5)      C(7)      O(2)      C(14)     -6.5(2)    . . . . yes

 C(5)      C(7)      O(2)      C(16)     -178.5(3)  . . . . yes

 C(5)      C(7)      C(6)      C(8)      3.9(6)     . . . . yes

 C(5)      C(7)      C(6)      C(13)     1.7(3)     . . . . yes

 C(5)      C(7)      C(8)      C(6)      -1.9(3)    . . . . yes

 C(5)      C(7)      C(8)      C(9)      -11.0(5)   . . . . yes

 C(5)      C(7)      C(8)      C(13)     0.3(2)     . . . . yes

 C(5)      C(7)      C(8)      C(14)     -4.2(3)    . . . . yes

 C(5)      C(7)      C(8)      C(16)     178.6(2)   . . . . yes

 C(5)      C(7)      C(14)     C(8)      175.2(3)   . . . . yes

 C(5)      C(7)      C(14)     C(9)      -169.4(5)  . . . . yes

 C(5)      C(7)      C(14)     C(10)     4.9(2)     . . . . yes

 C(5)      C(7)      C(14)     C(11)     33(4)      . . . . yes

 C(5)      C(7)      C(14)     C(13)     2.9(2)     . . . . yes

 C(5)      C(10)     C(4)      C(11)     177(5)     . . . . yes

 C(5)      C(10)     C(4)      C(12)     175(5)     . . . . yes

 C(5)      C(10)     C(11)     C(9)      0.2(2)     . . . . yes

 C(5)      C(10)     C(11)     C(12)     -178.2(4)  . . . . yes

 C(5)      C(10)     C(11)     C(14)     -3.6(2)    . . . . yes

 C(5)      C(10)     C(12)     C(9)      2.4(5)     . . . . yes

 C(5)      C(10)     C(12)     C(11)     3.3(7)     . . . . yes

 C(5)      C(10)     C(12)     C(13)     -1.5(3)    . . . . yes

 C(5)      C(10)     C(13)     C(6)      -1.7(3)    . . . . yes

 C(5)      C(10)     C(13)     C(8)      -173.7(7)  . . . . yes

 C(5)      C(10)     C(13)     C(9)      174.8(3)   . . . . yes

 C(5)      C(10)     C(13)     C(12)     178.6(3)   . . . . yes

 C(5)      C(10)     C(13)     C(14)     178.5(5)   . . . . yes

 C(5)      C(10)     C(14)     C(7)      -4.7(2)    . . . . yes

 C(5)      C(10)     C(14)     C(8)      -13.4(4)   . . . . yes

 C(5)      C(10)     C(14)     C(9)      172.7(2)   . . . . yes

 C(5)      C(10)     C(14)     C(11)     176.5(2)   . . . . yes

 C(5)      C(10)     C(14)     C(13)     -0.9(3)    . . . . yes

 C(5)      C(13)     C(6)      C(7)      -177.1(5)  . . . . yes

 C(5)      C(13)     C(6)      C(8)      -178.4(4)  . . . . yes

 C(5)      C(13)     C(8)      C(6)      0.8(2)     . . . . yes

 C(5)      C(13)     C(8)      C(7)      -0.5(3)    . . . . yes

 C(5)      C(13)     C(8)      C(9)      172.2(2)   . . . . yes

 C(5)      C(13)     C(8)      C(14)     172.0(3)   . . . . yes

 C(5)      C(13)     C(8)      C(16)     -139(3)    . . . . yes

 C(5)      C(13)     C(9)      C(8)      -15.1(4)   . . . . yes

 C(5)      C(13)     C(9)      C(11)     173.9(4)   . . . . yes

 C(5)      C(13)     C(9)      C(12)     173.6(5)   . . . . yes

 C(5)      C(13)     C(9)      C(14)     -14.8(4)   . . . . yes

 C(5)      C(13)     C(10)     C(11)     -176.2(3)  . . . . yes

 C(5)      C(13)     C(10)     C(12)     -178.6(3)  . . . . yes

 C(5)      C(13)     C(10)     C(14)     -178.5(5)  . . . . yes

 C(5)      C(13)     C(12)     C(9)      -173.1(5)  . . . . yes

 C(5)      C(13)     C(12)     C(10)     2.4(5)     . . . . yes

 C(5)      C(13)     C(12)     C(11)     -173.5(5)  . . . . yes

 C(5)      C(13)     C(14)     C(7)      -4.9(3)    . . . . yes

 C(5)      C(13)     C(14)     C(8)      -9.1(4)    . . . . yes

 C(5)      C(13)     C(14)     C(9)      171.4(3)   . . . . yes

 C(5)      C(13)     C(14)     C(10)     178.5(5)   . . . . yes

 C(5)      C(13)     C(14)     C(11)     176.3(3)   . . . . yes

 C(5)      C(14)     O(2)      C(7)      6.2(2)     . . . . yes

 C(5)      C(14)     O(2)      C(8)      7.8(3)     . . . . yes

 C(5)      C(14)     O(2)      C(16)     22.9(5)    . . . . yes

 C(5)      C(14)     O(3)      C(9)      86(1)      . . . . yes

 C(5)      C(14)     O(3)      C(11)     86(1)      . . . . yes

 C(5)      C(14)     C(7)      C(6)      2.7(2)     . . . . yes

 C(5)      C(14)     C(7)      C(8)      -175.2(3)  . . . . yes

 C(5)      C(14)     C(8)      C(6)      2.9(1)     . . . . yes

 C(5)      C(14)     C(8)      C(7)      4.1(3)     . . . . yes

 C(5)      C(14)     C(8)      C(9)      175.9(3)   . . . . yes

 C(5)      C(14)     C(8)      C(13)     -4.7(2)    . . . . yes

 C(5)      C(14)     C(8)      C(16)     178.9(4)   . . . . yes

 C(5)      C(14)     C(9)      C(8)      -172.4(5)  . . . . yes

 C(5)      C(14)     C(9)      C(11)     18.6(5)    . . . . yes

 C(5)      C(14)     C(9)      C(12)     15.4(4)    . . . . yes

 C(5)      C(14)     C(9)      C(13)     8.2(2)     . . . . yes

 C(5)      C(14)     C(10)     C(11)     -176.5(2)  . . . . yes

 C(5)      C(14)     C(10)     C(12)     -179.3(2)  . . . . yes

 C(5)      C(14)     C(10)     C(13)     0.9(3)     . . . . yes

 C(5)      C(14)     C(11)     C(9)      -168.5(3)  . . . . yes

 C(5)      C(14)     C(11)     C(10)     3.5(2)     . . . . yes

 C(5)      C(14)     C(11)     C(12)     6.1(2)     . . . . yes

 C(5)      C(14)     C(13)     C(6)      1.5(2)     . . . . yes

 C(5)      C(14)     C(13)     C(8)      9.1(4)     . . . . yes

 C(5)      C(14)     C(13)     C(9)      -171.4(3)  . . . . yes

 C(5)      C(14)     C(13)     C(10)     -178.5(5)  . . . . yes

 C(5)      C(14)     C(13)     C(12)     -178.6(3)  . . . . yes

 C(6)      C(5)      C(7)      C(8)      176.6(5)   . . . . yes

 C(6)      C(5)      C(7)      C(14)     174.2(5)   . . . . yes

 C(6)      C(5)      C(10)     C(11)     7.4(6)     . . . . yes

 C(6)      C(5)      C(10)     C(12)     5.5(9)     . . . . yes

 C(6)      C(5)      C(10)     C(13)     2.9(6)     . . . . yes

 C(6)      C(5)      C(10)     C(14)     3.8(6)     . . . . yes

 C(6)      C(5)      C(13)     C(8)      -1.4(4)    . . . . yes

 C(6)      C(5)      C(13)     C(9)      11.9(7)    . . . . yes

 C(6)      C(5)      C(13)     C(10)     -178.2(3)  . . . . yes

 C(6)      C(5)      C(13)     C(12)     -179.6(4)  . . . . yes

 C(6)      C(5)      C(13)     C(14)     3.3(5)     . . . . yes

 C(6)      C(5)      C(14)     C(7)      -2.9(2)    . . . . yes

 C(6)      C(5)      C(14)     C(8)      -5.3(3)    . . . . yes

 C(6)      C(5)      C(14)     C(9)      168.5(4)   . . . . yes

 C(6)      C(5)      C(14)     C(10)     -178.0(3)  . . . . yes

 C(6)      C(5)      C(14)     C(11)     178.5(2)   . . . . yes

 C(6)      C(5)      C(14)     C(13)     -177.2(4)  . . . . yes

 C(6)      C(7)      O(2)      C(8)      -8.8(5)    . . . . yes

 C(6)      C(7)      O(2)      C(14)     -7.0(5)    . . . . yes

 C(6)      C(7)      O(2)      C(16)     -178.9(6)  . . . . yes

 C(6)      C(7)      C(5)      C(10)     -179.0(5)  . . . . yes

 C(6)      C(7)      C(5)      C(13)     -177.1(5)  . . . . yes

 C(6)      C(7)      C(5)      C(14)     -174.2(5)  . . . . yes

 C(6)      C(7)      C(8)      C(9)      -9.2(6)    . . . . yes

 C(6)      C(7)      C(8)      C(13)     2.1(4)     . . . . yes

 C(6)      C(7)      C(8)      C(14)     -2.4(5)    . . . . yes

 C(6)      C(7)      C(8)      C(16)     -179.5(4)  . . . . yes

 C(6)      C(7)      C(14)     C(8)      178.0(4)   . . . . yes

 C(6)      C(7)      C(14)     C(9)      -166.6(4)  . . . . yes

 C(6)      C(7)      C(14)     C(10)     7.6(3)     . . . . yes

 C(6)      C(7)      C(14)     C(11)     36(4)      . . . . yes

 C(6)      C(7)      C(14)     C(13)     5.7(3)     . . . . yes

 C(6)      C(8)      O(2)      C(7)      6.3(4)     . . . . yes

 C(6)      C(8)      O(2)      C(14)     -170.8(6)  . . . . yes

 C(6)      C(8)      O(2)      C(16)     17.5(6)    . . . . yes

 C(6)      C(8)      C(7)      C(14)     2.4(5)     . . . . yes

 C(6)      C(8)      C(9)      C(11)     26.7(4)    . . . . yes

 C(6)      C(8)      C(9)      C(12)     16.8(2)    . . . . yes

 C(6)      C(8)      C(9)      C(13)     8.2(2)     . . . . yes

 C(6)      C(8)      C(9)      C(14)     7.9(3)     . . . . yes

 C(6)      C(8)      C(13)     C(9)      -171.5(2)  . . . . yes

 C(6)      C(8)      C(13)     C(10)     175.5(5)   . . . . yes

 C(6)      C(8)      C(13)     C(12)     179.7(2)   . . . . yes

 C(6)      C(8)      C(13)     C(14)     -171.2(3)  . . . . yes

 C(6)      C(8)      C(14)     C(7)      -1.2(2)    . . . . yes

 C(6)      C(8)      C(14)     C(9)      -173.0(2)  . . . . yes

 C(6)      C(8)      C(14)     C(10)     14.6(4)    . . . . yes

 C(6)      C(8)      C(14)     C(11)     175.8(4)   . . . . yes

 C(6)      C(8)      C(14)     C(13)     7.6(3)     . . . . yes

 C(6)      C(13)     C(5)      C(7)      1.7(3)     . . . . yes

 C(6)      C(13)     C(5)      C(10)     178.2(3)   . . . . yes

 C(6)      C(13)     C(5)      C(14)     -3.3(5)    . . . . yes

 C(6)      C(13)     C(8)      C(7)      -1.3(2)    . . . . yes

 C(6)      C(13)     C(8)      C(9)      171.5(2)   . . . . yes

 C(6)      C(13)     C(8)      C(14)     171.2(3)   . . . . yes

 C(6)      C(13)     C(8)      C(16)     -140(3)    . . . . yes

 C(6)      C(13)     C(9)      C(8)      -8.6(2)    . . . . yes

 C(6)      C(13)     C(9)      C(11)     -179.6(2)  . . . . yes

 C(6)      C(13)     C(9)      C(12)     -179.9(2)  . . . . yes

 C(6)      C(13)     C(9)      C(14)     -8.3(2)    . . . . yes

 C(6)      C(13)     C(10)     C(11)     -177.9(4)  . . . . yes

 C(6)      C(13)     C(10)     C(12)     179.7(4)   . . . . yes

 C(6)      C(13)     C(10)     C(14)     179.8(7)   . . . . yes

 C(6)      C(13)     C(12)     C(9)      173(12)    . . . . yes

 C(6)      C(13)     C(12)     C(10)     -10(12)    . . . . yes

 C(6)      C(13)     C(12)     C(11)     173(12)    . . . . yes

 C(6)      C(13)     C(14)     C(7)      -3.3(2)    . . . . yes

 C(6)      C(13)     C(14)     C(8)      -7.6(3)    . . . . yes

 C(6)      C(13)     C(14)     C(9)      172.9(2)   . . . . yes

 C(6)      C(13)     C(14)     C(10)     -179.9(3)  . . . . yes

 C(6)      C(13)     C(14)     C(11)     177.8(1)   . . . . yes

 C(7)      O(2)      O(3)      C(9)      25.7(2)    . . . . yes

 C(7)      O(2)      O(3)      C(11)     34.4(2)    . . . . yes

 C(7)      O(2)      O(3)      C(14)     16.5(2)    . . . . yes

 C(7)      O(2)      C(8)      C(9)      -177.9(3)  . . . . yes

 C(7)      O(2)      C(8)      C(13)     166.4(6)   . . . . yes

 C(7)      O(2)      C(8)      C(14)     177.1(5)   . . . . yes

 C(7)      O(2)      C(8)      C(16)     -11.2(5)   . . . . yes

 C(7)      O(2)      C(14)     C(8)      -1.6(2)    . . . . yes

 C(7)      O(2)      C(14)     C(9)      -172.6(2)  . . . . yes

 C(7)      O(2)      C(14)     C(10)     85(1)      . . . . yes

 C(7)      O(2)      C(14)     C(11)     178.3(2)   . . . . yes

 C(7)      O(2)      C(14)     C(13)     17.9(4)    . . . . yes

 C(7)      O(2)      C(16)     C(8)      5.3(2)     . . . . yes

 C(7)      C(5)      C(6)      C(8)      -1.9(3)    . . . . yes

 C(7)      C(5)      C(6)      C(13)     -3.4(6)    . . . . yes

 C(7)      C(5)      C(10)     C(11)     8.4(3)     . . . . yes

 C(7)      C(5)      C(10)     C(12)     6.5(6)     . . . . yes

 C(7)      C(5)      C(10)     C(13)     4.0(3)     . . . . yes

 C(7)      C(5)      C(10)     C(14)     4.9(2)     . . . . yes

 C(7)      C(5)      C(13)     C(8)      0.3(2)     . . . . yes

 C(7)      C(5)      C(13)     C(9)      13.6(5)    . . . . yes

 C(7)      C(5)      C(13)     C(10)     -176.5(3)  . . . . yes

 C(7)      C(5)      C(13)     C(12)     -177.9(4)  . . . . yes

 C(7)      C(5)      C(13)     C(14)     5.0(3)     . . . . yes

 C(7)      C(5)      C(14)     C(8)      -2.3(2)    . . . . yes

 C(7)      C(5)      C(14)     C(9)      171.4(4)   . . . . yes

 C(7)      C(5)      C(14)     C(10)     -175.1(2)  . . . . yes

 C(7)      C(5)      C(14)     C(11)     -178.6(2)  . . . . yes

 C(7)      C(5)      C(14)     C(13)     -174.3(3)  . . . . yes

 C(7)      C(6)      C(5)      C(10)     1.8(8)     . . . . yes

 C(7)      C(6)      C(5)      C(13)     3.4(6)     . . . . yes

 C(7)      C(6)      C(5)      C(14)     5.1(4)     . . . . yes

 C(7)      C(6)      C(8)      C(9)      174.4(4)   . . . . yes

 C(7)      C(6)      C(8)      C(13)     -177.5(4)  . . . . yes

 C(7)      C(6)      C(8)      C(14)     178.0(4)   . . . . yes

 C(7)      C(6)      C(8)      C(16)     0.6(4)     . . . . yes

 C(7)      C(6)      C(13)     C(8)      1.2(2)     . . . . yes

 C(7)      C(6)      C(13)     C(9)      10.0(3)    . . . . yes

 C(7)      C(6)      C(13)     C(10)     -174.1(5)  . . . . yes

 C(7)      C(6)      C(13)     C(12)     -163(12)   . . . . yes

 C(7)      C(6)      C(13)     C(14)     5.8(3)     . . . . yes

 C(7)      C(8)      O(2)      C(14)     -177.1(5)  . . . . yes

 C(7)      C(8)      O(2)      C(16)     11.2(5)    . . . . yes

 C(7)      C(8)      C(6)      C(13)     177.5(4)   . . . . yes

 C(7)      C(8)      C(9)      C(11)     31.8(6)    . . . . yes

 C(7)      C(8)      C(9)      C(12)     22.0(5)    . . . . yes

 C(7)      C(8)      C(9)      C(13)     13.4(4)    . . . . yes

 C(7)      C(8)      C(9)      C(14)     13.0(4)    . . . . yes

 C(7)      C(8)      C(13)     C(9)      -172.7(2)  . . . . yes

 C(7)      C(8)      C(13)     C(10)     174.2(5)   . . . . yes

 C(7)      C(8)      C(13)     C(12)     178.5(2)   . . . . yes

 C(7)      C(8)      C(13)     C(14)     -172.4(3)  . . . . yes

 C(7)      C(8)      C(14)     C(9)      -171.8(3)  . . . . yes

 C(7)      C(8)      C(14)     C(10)     15.8(5)    . . . . yes

 C(7)      C(8)      C(14)     C(11)     177.0(3)   . . . . yes

 C(7)      C(8)      C(14)     C(13)     8.7(4)     . . . . yes

 C(7)      C(14)     O(2)      C(8)      1.6(2)     . . . . yes

 C(7)      C(14)     O(2)      C(16)     16.7(5)    . . . . yes

 C(7)      C(14)     O(3)      C(9)      -179.2(3)  . . . . yes

 C(7)      C(14)     O(3)      C(11)     -179.0(2)  . . . . yes

 C(7)      C(14)     C(5)      C(10)     175.1(2)   . . . . yes

 C(7)      C(14)     C(5)      C(13)     174.3(3)   . . . . yes

 C(7)      C(14)     C(8)      C(9)      171.8(3)   . . . . yes

 C(7)      C(14)     C(8)      C(13)     -8.7(4)    . . . . yes

 C(7)      C(14)     C(8)      C(16)     174.8(6)   . . . . yes

 C(7)      C(14)     C(9)      C(8)      -9.1(3)    . . . . yes

 C(7)      C(14)     C(9)      C(11)     -178.1(4)  . . . . yes

 C(7)      C(14)     C(9)      C(12)     178.7(4)   . . . . yes

 C(7)      C(14)     C(9)      C(13)     171.4(6)   . . . . yes

 C(7)      C(14)     C(10)     C(11)     178.7(2)   . . . . yes

 C(7)      C(14)     C(10)     C(12)     176.0(2)   . . . . yes

 C(7)      C(14)     C(10)     C(13)     -3.9(3)    . . . . yes

 C(7)      C(14)     C(11)     C(9)      158(4)     . . . . yes

 C(7)      C(14)     C(11)     C(10)     -29(4)     . . . . yes

 C(7)      C(14)     C(11)     C(12)     -26(4)     . . . . yes

 C(7)      C(14)     C(13)     C(8)      4.3(2)     . . . . yes

 C(7)      C(14)     C(13)     C(9)      -176.2(3)  . . . . yes

 C(7)      C(14)     C(13)     C(10)     176.6(3)   . . . . yes

 C(7)      C(14)     C(13)     C(12)     176.5(1)   . . . . yes

 C(8)      O(2)      O(3)      C(9)      19.1(2)    . . . . yes

 C(8)      O(2)      O(3)      C(11)     27.8(2)    . . . . yes

 C(8)      O(2)      O(3)      C(14)     9.8(2)     . . . . yes

 C(8)      O(2)      C(7)      C(14)     -1.8(3)    . . . . yes

 C(8)      O(2)      C(14)     C(9)      -171.0(3)  . . . . yes

 C(8)      O(2)      C(14)     C(10)     87(1)      . . . . yes

 C(8)      O(2)      C(14)     C(11)     179.9(3)   . . . . yes

 C(8)      O(2)      C(14)     C(13)     19.5(4)    . . . . yes

 C(8)      C(6)      C(5)      C(10)     -0.2(6)    . . . . yes

 C(8)      C(6)      C(5)      C(13)     1.4(4)     . . . . yes

 C(8)      C(6)      C(5)      C(14)     3.1(2)     . . . . yes

 C(8)      C(6)      C(7)      C(14)     -1.2(2)    . . . . yes

 C(8)      C(6)      C(13)     C(9)      8.8(2)     . . . . yes

 C(8)      C(6)      C(13)     C(10)     -175.3(5)  . . . . yes

 C(8)      C(6)      C(13)     C(12)     -165(12)   . . . . yes

 C(8)      C(6)      C(13)     C(14)     4.5(2)     . . . . yes

 C(8)      C(7)      O(2)      C(14)     1.8(3)     . . . . yes

 C(8)      C(7)      O(2)      C(16)     -170.1(4)  . . . . yes

 C(8)      C(7)      C(5)      C(10)     -2.4(3)    . . . . yes

 C(8)      C(7)      C(5)      C(13)     -0.5(3)    . . . . yes

 C(8)      C(7)      C(5)      C(14)     2.4(2)     . . . . yes

 C(8)      C(7)      C(6)      C(13)     -2.2(4)    . . . . yes

 C(8)      C(7)      C(14)     C(9)      15.4(5)    . . . . yes

 C(8)      C(7)      C(14)     C(10)     -170.3(3)  . . . . yes

 C(8)      C(7)      C(14)     C(11)     -141(4)    . . . . yes

 C(8)      C(7)      C(14)     C(13)     -172.3(4)  . . . . yes

 C(8)      C(9)      P(1)      C(17)     -82.2(2)   . . . . yes

 C(8)      C(9)      P(1)      C(19)     25.2(2)    . . . . yes

 C(8)      C(9)      O(3)      C(11)     -174.7(3)  . . . . yes

 C(8)      C(9)      O(3)      C(14)     4.9(2)     . . . . yes

 C(8)      C(9)      C(1)      C(11)     -82(1)     . . . . yes

 C(8)      C(9)      C(1)      C(12)     -82(1)     . . . . yes

 C(8)      C(9)      C(1)      C(15)     104(1)     . . . . yes

 C(8)      C(9)      C(11)     C(10)     -17.3(4)   . . . . yes

 C(8)      C(9)      C(11)     C(12)     -16.4(5)   . . . . yes

 C(8)      C(9)      C(11)     C(14)     -10.4(2)   . . . . yes

 C(8)      C(9)      C(12)     C(10)     -10.7(2)   . . . . yes

 C(8)      C(9)      C(12)     C(11)     170.8(3)   . . . . yes

 C(8)      C(9)      C(12)     C(13)     -8.6(1)    . . . . yes

 C(8)      C(9)      C(13)     C(10)     173.4(2)   . . . . yes

 C(8)      C(9)      C(13)     C(12)     171.3(1)   . . . . yes

 C(8)      C(9)      C(13)     C(14)     -0.3(2)    . . . . yes

 C(8)      C(9)      C(14)     C(10)     175.9(3)   . . . . yes

 C(8)      C(9)      C(14)     C(11)     169.0(3)   . . . . yes

 C(8)      C(9)      C(14)     C(13)     179.5(4)   . . . . yes

 C(8)      C(13)     C(5)      C(10)     176.8(3)   . . . . yes

 C(8)      C(13)     C(5)      C(14)     -4.7(2)    . . . . yes

 C(8)      C(13)     C(9)      C(11)     -171.0(2)  . . . . yes

 C(8)      C(13)     C(9)      C(12)     -171.3(1)  . . . . yes

 C(8)      C(13)     C(9)      C(14)     0.3(2)     . . . . yes

 C(8)      C(13)     C(10)     C(11)     10.1(5)    . . . . yes

 C(8)      C(13)     C(10)     C(12)     7.7(7)     . . . . yes

 C(8)      C(13)     C(10)     C(14)     7.8(3)     . . . . yes

 C(8)      C(13)     C(12)     C(9)      9.0(1)     . . . . yes

 C(8)      C(13)     C(12)     C(10)     -175.5(4)  . . . . yes

 C(8)      C(13)     C(12)     C(11)     8.7(2)     . . . . yes

 C(8)      C(13)     C(14)     C(9)      -179.5(4)  . . . . yes

 C(8)      C(13)     C(14)     C(10)     -172.3(3)  . . . . yes

 C(8)      C(13)     C(14)     C(11)     -174.6(3)  . . . . yes

 C(8)      C(14)     O(2)      C(16)     15.1(5)    . . . . yes

 C(8)      C(14)     O(3)      C(9)      -171.3(3)  . . . . yes

 C(8)      C(14)     O(3)      C(11)     -171.1(2)  . . . . yes

 C(8)      C(14)     C(5)      C(10)     172.8(2)   . . . . yes

 C(8)      C(14)     C(5)      C(13)     171.9(3)   . . . . yes

 C(8)      C(14)     C(9)      C(11)     -169.0(3)  . . . . yes

 C(8)      C(14)     C(9)      C(12)     -172.2(2)  . . . . yes

 C(8)      C(14)     C(9)      C(13)     -179.5(4)  . . . . yes

 C(8)      C(14)     C(10)     C(11)     170.1(4)   . . . . yes

 C(8)      C(14)     C(10)     C(12)     167.3(4)   . . . . yes

 C(8)      C(14)     C(10)     C(13)     -12.6(4)   . . . . yes

 C(8)      C(14)     C(11)     C(9)      19.7(4)    . . . . yes

 C(8)      C(14)     C(11)     C(10)     -168.3(4)  . . . . yes

 C(8)      C(14)     C(11)     C(12)     -165.7(4)  . . . . yes

 C(8)      C(14)     C(13)     C(9)      179.5(4)   . . . . yes

 C(8)      C(14)     C(13)     C(10)     172.3(3)   . . . . yes

 C(8)      C(14)     C(13)     C(12)     172.3(2)   . . . . yes

 C(8)      C(16)     O(2)      C(14)     -9.3(3)    . . . . yes

 C(9)      P(1)      O(3)      C(11)     -33.5(2)   . . . . yes

 C(9)      P(1)      O(3)      C(14)     37.1(2)    . . . . yes

 C(9)      P(1)      O(5)      C(17)     71.6(4)    . . . . yes

 C(9)      P(1)      O(5)      C(18)     32.8(4)    . . . . yes

 C(9)      P(1)      O(6)      C(19)     155.0(4)   . . . . yes

 C(9)      P(1)      O(6)      C(20)     177.6(5)   . . . . yes

 C(9)      P(1)      C(17)     C(18)     -74.8(5)   . . . . yes

 C(9)      P(1)      C(19)     C(20)     -58.7(8)   . . . . yes

 C(9)      O(3)      P(1)      C(17)     176.6(2)   . . . . yes

 C(9)      O(3)      P(1)      C(19)     -98.7(3)   . . . . yes

 C(9)      O(3)      O(1)      C(11)     -4.1(1)    . . . . yes

 C(9)      O(3)      O(1)      C(15)     -153.9(4)  . . . . yes

 C(9)      O(3)      O(2)      C(14)     9.2(1)     . . . . yes

 C(9)      O(3)      O(2)      C(16)     162.2(5)   . . . . yes

 C(9)      O(3)      O(5)      C(17)     170.8(4)   . . . . yes

 C(9)      O(3)      O(5)      C(18)     135.8(4)   . . . . yes

 C(9)      O(3)      O(6)      C(19)     112(1)     . . . . yes

 C(9)      O(3)      O(6)      C(20)     -113.7(6)  . . . . yes

 C(9)      O(3)      C(11)     C(10)     -7.4(2)    . . . . yes

 C(9)      O(3)      C(11)     C(12)     -9.4(4)    . . . . yes

 C(9)      O(3)      C(11)     C(14)     0.2(2)     . . . . yes

 C(9)      O(3)      C(14)     C(10)     7.4(2)     . . . . yes

 C(9)      O(3)      C(14)     C(11)     -0.2(2)    . . . . yes

 C(9)      O(3)      C(14)     C(13)     16.7(4)    . . . . yes

 C(9)      C(1)      O(1)      C(11)     -1.6(2)    . . . . yes

 C(9)      C(1)      O(1)      C(15)     162.7(3)   . . . . yes

 C(9)      C(1)      C(2)      C(11)     0.8(2)     . . . . yes

 C(9)      C(1)      C(3)      C(12)     1.1(2)     . . . . yes

 C(9)      C(1)      C(11)     C(10)     -177.9(5)  . . . . yes

 C(9)      C(1)      C(11)     C(12)     -179.7(4)  . . . . yes

 C(9)      C(1)      C(11)     C(14)     6.2(3)     . . . . yes

 C(9)      C(1)      C(12)     C(10)     -3.4(5)    . . . . yes

 C(9)      C(1)      C(12)     C(11)     0.2(2)     . . . . yes

 C(9)      C(1)      C(12)     C(13)     0.5(2)     . . . . yes

 C(9)      C(8)      O(2)      C(14)     5.0(2)     . . . . yes

 C(9)      C(8)      O(2)      C(16)     -166.7(3)  . . . . yes

 C(9)      C(8)      C(6)      C(13)     -8.1(2)    . . . . yes

 C(9)      C(8)      C(7)      C(14)     -6.8(2)    . . . . yes

 C(9)      C(8)      C(13)     C(10)     -13.1(4)   . . . . yes

 C(9)      C(8)      C(13)     C(12)     -8.8(1)    . . . . yes

 C(9)      C(8)      C(13)     C(14)     0.3(2)     . . . . yes

 C(9)      C(8)      C(14)     C(10)     -172.5(6)  . . . . yes

 C(9)      C(8)      C(14)     C(11)     -11.3(2)   . . . . yes

 C(9)      C(8)      C(14)     C(13)     -179.5(4)  . . . . yes

 C(9)      C(11)     O(1)      C(15)     149.5(5)   . . . . yes

 C(9)      C(11)     O(3)      C(14)     -0.2(2)    . . . . yes

 C(9)      C(11)     C(1)      C(12)     179.7(4)   . . . . yes

 C(9)      C(11)     C(1)      C(15)     11.3(5)    . . . . yes

 C(9)      C(11)     C(4)      C(10)     0.2(4)     . . . . yes

 C(9)      C(11)     C(4)      C(12)     1.8(5)     . . . . yes

 C(9)      C(11)     C(10)     C(12)     178.5(4)   . . . . yes

 C(9)      C(11)     C(10)     C(13)     2.4(2)     . . . . yes

 C(9)      C(11)     C(10)     C(14)     3.8(1)     . . . . yes

 C(9)      C(11)     C(12)     C(10)     -1.7(4)    . . . . yes

 C(9)      C(11)     C(12)     C(13)     0.5(3)     . . . . yes

 C(9)      C(11)     C(14)     C(10)     -172.0(3)  . . . . yes

 C(9)      C(11)     C(14)     C(13)     -170.7(3)  . . . . yes

 C(9)      C(12)     C(1)      C(11)     -0.2(2)    . . . . yes

 C(9)      C(12)     C(1)      C(15)     75(1)      . . . . yes

 C(9)      C(12)     C(4)      C(10)     176.0(7)   . . . . yes

 C(9)      C(12)     C(4)      C(11)     -1.1(3)    . . . . yes

 C(9)      C(12)     C(10)     C(11)     -0.9(2)    . . . . yes

 C(9)      C(12)     C(10)     C(13)     3.8(3)     . . . . yes

 C(9)      C(12)     C(10)     C(14)     3.8(1)     . . . . yes

 C(9)      C(12)     C(11)     C(10)     1.7(4)     . . . . yes

 C(9)      C(12)     C(11)     C(14)     -2.9(2)    . . . . yes

 C(9)      C(12)     C(13)     C(10)     -175.6(4)  . . . . yes

 C(9)      C(12)     C(13)     C(14)     4.3(1)     . . . . yes

 C(9)      C(13)     C(5)      C(10)     -169.9(7)  . . . . yes

 C(9)      C(13)     C(5)      C(14)     8.6(3)     . . . . yes

 C(9)      C(13)     C(8)      C(14)     -0.3(2)    . . . . yes

 C(9)      C(13)     C(8)      C(16)     47(3)      . . . . yes

 C(9)      C(13)     C(10)     C(11)     -1.4(1)    . . . . yes

 C(9)      C(13)     C(10)     C(12)     -3.8(3)    . . . . yes

 C(9)      C(13)     C(10)     C(14)     -3.7(2)    . . . . yes

 C(9)      C(13)     C(12)     C(10)     175.6(4)   . . . . yes

 C(9)      C(13)     C(12)     C(11)     -0.3(1)    . . . . yes

 C(9)      C(13)     C(14)     C(10)     7.2(4)     . . . . yes

 C(9)      C(13)     C(14)     C(11)     4.9(2)     . . . . yes

 C(9)      C(14)     O(2)      C(16)     -155.8(5)  . . . . yes

 C(9)      C(14)     O(3)      C(11)     0.2(2)     . . . . yes

 C(9)      C(14)     C(5)      C(10)     -13.5(3)   . . . . yes

 C(9)      C(14)     C(5)      C(13)     -14.3(4)   . . . . yes

 C(9)      C(14)     C(8)      C(13)     179.5(4)   . . . . yes

 C(9)      C(14)     C(8)      C(16)     3.0(6)     . . . . yes

 C(9)      C(14)     C(10)     C(11)     -3.8(1)    . . . . yes

 C(9)      C(14)     C(10)     C(12)     -6.5(2)    . . . . yes

 C(9)      C(14)     C(10)     C(13)     173.6(3)   . . . . yes

 C(9)      C(14)     C(11)     C(10)     172.0(3)   . . . . yes

 C(9)      C(14)     C(11)     C(12)     174.6(3)   . . . . yes

 C(9)      C(14)     C(13)     C(10)     -7.2(4)    . . . . yes

 C(9)      C(14)     C(13)     C(12)     -7.3(2)    . . . . yes

 C(10)     C(4)      C(2)      C(11)     -1.0(2)    . . . . yes

 C(10)     C(4)      C(3)      C(12)     -2.7(4)    . . . . yes

 C(10)     C(4)      C(11)     C(12)     -1.6(3)    . . . . yes

 C(10)     C(4)      C(11)     C(14)     -3.6(2)    . . . . yes

 C(10)     C(4)      C(12)     C(11)     177.1(5)   . . . . yes

 C(10)     C(4)      C(12)     C(13)     -1.7(3)    . . . . yes

 C(10)     C(5)      C(6)      C(13)     -1.6(3)    . . . . yes

 C(10)     C(5)      C(7)      C(14)     -4.8(2)    . . . . yes

 C(10)     C(5)      C(13)     C(12)     -1.4(3)    . . . . yes

 C(10)     C(5)      C(13)     C(14)     -178.5(5)  . . . . yes

 C(10)     C(5)      C(14)     C(11)     -3.5(2)    . . . . yes

 C(10)     C(5)      C(14)     C(13)     0.8(3)     . . . . yes

 C(10)     C(11)     O(1)      C(15)     -44(3)     . . . . yes

 C(10)     C(11)     O(3)      C(14)     -7.6(1)    . . . . yes

 C(10)     C(11)     C(1)      C(12)     1.8(2)     . . . . yes

 C(10)     C(11)     C(1)      C(15)     -166.6(3)  . . . . yes

 C(10)     C(11)     C(4)      C(12)     1.6(3)     . . . . yes

 C(10)     C(11)     C(9)      C(12)     -0.9(2)    . . . . yes

 C(10)     C(11)     C(9)      C(13)     -1.4(1)    . . . . yes

 C(10)     C(11)     C(9)      C(14)     -6.9(3)    . . . . yes

 C(10)     C(11)     C(12)     C(13)     2.3(2)     . . . . yes

 C(10)     C(11)     C(14)     C(13)     1.3(2)     . . . . yes

 C(10)     C(12)     C(1)      C(11)     -3.6(5)    . . . . yes

 C(10)     C(12)     C(1)      C(15)     71(1)      . . . . yes

 C(10)     C(12)     C(4)      C(11)     -177.1(5)  . . . . yes

 C(10)     C(12)     C(9)      C(11)     178.5(4)   . . . . yes

 C(10)     C(12)     C(9)      C(13)     -2.1(2)    . . . . yes

 C(10)     C(12)     C(9)      C(14)     -6.6(2)    . . . . yes

 C(10)     C(12)     C(11)     C(14)     -4.6(3)    . . . . yes

 C(10)     C(12)     C(13)     C(14)     179.9(4)   . . . . yes

 C(10)     C(13)     C(5)      C(14)     178.5(5)   . . . . yes

 C(10)     C(13)     C(8)      C(14)     -13.4(5)   . . . . yes

 C(10)     C(13)     C(8)      C(16)     34(4)      . . . . yes

 C(10)     C(13)     C(9)      C(11)     2.4(2)     . . . . yes

 C(10)     C(13)     C(9)      C(12)     2.1(2)     . . . . yes

 C(10)     C(13)     C(9)      C(14)     173.7(3)   . . . . yes

 C(10)     C(13)     C(12)     C(11)     -175.9(4)  . . . . yes

 C(10)     C(13)     C(14)     C(11)     -2.3(3)    . . . . yes

 C(10)     C(14)     O(2)      C(16)     102(1)     . . . . yes

 C(10)     C(14)     O(3)      C(11)     7.6(1)     . . . . yes

 C(10)     C(14)     C(5)      C(13)     -0.8(3)    . . . . yes

 C(10)     C(14)     C(8)      C(13)     7.0(2)     . . . . yes

 C(10)     C(14)     C(8)      C(16)     -169.5(3)  . . . . yes

 C(10)     C(14)     C(9)      C(11)     6.9(3)     . . . . yes

 C(10)     C(14)     C(9)      C(12)     3.7(1)     . . . . yes

 C(10)     C(14)     C(9)      C(13)     -3.6(2)    . . . . yes

 C(10)     C(14)     C(11)     C(12)     2.6(2)     . . . . yes

 C(10)     C(14)     C(13)     C(12)     -0.1(2)    . . . . yes

 C(11)     O(1)      O(3)      C(14)     -8.2(1)    . . . . yes

 C(11)     O(1)      C(1)      C(12)     3.2(2)     . . . . yes

 C(11)     O(1)      C(1)      C(15)     -164.3(3)  . . . . yes

 C(11)     O(3)      P(1)      C(17)     143.0(2)   . . . . yes

 C(11)     O(3)      P(1)      C(19)     -132.2(2)  . . . . yes

 C(11)     O(3)      O(1)      C(15)     -149.8(4)  . . . . yes

 C(11)     O(3)      O(2)      C(14)     17.9(1)    . . . . yes

 C(11)     O(3)      O(2)      C(16)     170.9(5)   . . . . yes

 C(11)     O(3)      O(5)      C(17)     143.9(3)   . . . . yes

 C(11)     O(3)      O(5)      C(18)     108.9(2)   . . . . yes

 C(11)     O(3)      O(6)      C(19)     78(1)      . . . . yes

 C(11)     O(3)      O(6)      C(20)     -147.6(6)  . . . . yes

 C(11)     O(3)      C(9)      C(12)     6.0(2)     . . . . yes

 C(11)     O(3)      C(9)      C(13)     170.0(5)   . . . . yes

 C(11)     O(3)      C(9)      C(14)     -179.6(4)  . . . . yes

 C(11)     O(3)      C(14)     C(13)     16.9(3)    . . . . yes

 C(11)     C(1)      O(1)      C(15)     164.3(3)   . . . . yes

 C(11)     C(1)      C(3)      C(12)     0.5(2)     . . . . yes

 C(11)     C(1)      C(9)      C(12)     0.2(3)     . . . . yes

 C(11)     C(1)      C(9)      C(13)     -0.3(3)    . . . . yes

 C(11)     C(1)      C(9)      C(14)     -9.9(4)    . . . . yes

 C(11)     C(1)      C(12)     C(13)     0.3(2)     . . . . yes

 C(11)     C(2)      O(1)      C(15)     165.5(2)   . . . . yes

 C(11)     C(2)      C(1)      C(12)     -0.3(2)    . . . . yes

 C(11)     C(2)      C(1)      C(15)     173.3(3)   . . . . yes

 C(11)     C(2)      C(3)      C(12)     0.5(2)     . . . . yes

 C(11)     C(2)      C(4)      C(12)     0.3(2)     . . . . yes

 C(11)     C(4)      C(3)      C(12)     0.0(3)     . . . . yes

 C(11)     C(4)      C(10)     C(12)     1.7(3)     . . . . yes

 C(11)     C(4)      C(10)     C(13)     5.1(6)     . . . . yes

 C(11)     C(4)      C(10)     C(14)     3.8(2)     . . . . yes

 C(11)     C(4)      C(12)     C(13)     -178.9(7)  . . . . yes

 C(11)     C(9)      P(1)      C(17)     108.4(2)   . . . . yes

 C(11)     C(9)      P(1)      C(19)     -144.1(3)  . . . . yes

 C(11)     C(9)      O(3)      C(14)     179.6(4)   . . . . yes

 C(11)     C(9)      C(1)      C(12)     -0.2(3)    . . . . yes

 C(11)     C(9)      C(1)      C(15)     -172.8(3)  . . . . yes

 C(11)     C(9)      C(8)      C(13)     18.5(4)    . . . . yes

 C(11)     C(9)      C(8)      C(14)     18.8(4)    . . . . yes

 C(11)     C(9)      C(8)      C(16)     -159.3(4)  . . . . yes

 C(11)     C(9)      C(12)     C(13)     -179.4(3)  . . . . yes

 C(11)     C(9)      C(13)     C(12)     0.3(2)     . . . . yes

 C(11)     C(9)      C(13)     C(14)     -171.3(3)  . . . . yes

 C(11)     C(9)      C(14)     C(13)     10.5(4)    . . . . yes

 C(11)     C(10)     C(4)      C(12)     -1.7(3)    . . . . yes

 C(11)     C(10)     C(5)      C(13)     4.5(3)     . . . . yes

 C(11)     C(10)     C(5)      C(14)     3.6(2)     . . . . yes

 C(11)     C(10)     C(12)     C(13)     -4.7(5)    . . . . yes

 C(11)     C(10)     C(13)     C(12)     2.4(2)     . . . . yes

 C(11)     C(10)     C(13)     C(14)     2.3(3)     . . . . yes

 C(11)     C(10)     C(14)     C(13)     -177.4(3)  . . . . yes

 C(11)     C(12)     C(1)      C(15)     75(1)      . . . . yes

 C(11)     C(12)     C(9)      C(13)     179.4(3)   . . . . yes

 C(11)     C(12)     C(9)      C(14)     174.9(3)   . . . . yes

 C(11)     C(12)     C(10)     C(13)     4.7(5)     . . . . yes

 C(11)     C(12)     C(10)     C(14)     4.7(3)     . . . . yes

 C(11)     C(12)     C(13)     C(14)     4.0(2)     . . . . yes

 C(11)     C(14)     O(2)      C(16)     -165.0(5)  . . . . yes

 C(11)     C(14)     C(5)      C(13)     -4.3(3)    . . . . yes

 C(11)     C(14)     C(8)      C(13)     168.2(6)   . . . . yes

 C(11)     C(14)     C(8)      C(16)     -8.3(7)    . . . . yes

 C(11)     C(14)     C(9)      C(12)     -3.2(2)    . . . . yes

 C(11)     C(14)     C(9)      C(13)     -10.5(4)   . . . . yes

 C(11)     C(14)     C(10)     C(12)     -2.7(2)    . . . . yes

 C(11)     C(14)     C(10)     C(13)     177.4(3)   . . . . yes

 C(11)     C(14)     C(13)     C(12)     -2.3(1)    . . . . yes

 C(12)     C(1)      O(1)      C(15)     167.5(4)   . . . . yes

 C(12)     C(1)      C(9)      C(13)     -0.5(1)    . . . . yes

 C(12)     C(1)      C(9)      C(14)     -10.1(4)   . . . . yes

 C(12)     C(1)      C(11)     C(14)     -174.1(6)  . . . . yes

 C(12)     C(3)      C(1)      C(15)     172.4(2)   . . . . yes

 C(12)     C(4)      C(10)     C(13)     3.4(6)     . . . . yes

 C(12)     C(4)      C(10)     C(14)     2.1(3)     . . . . yes

 C(12)     C(4)      C(11)     C(14)     -2.0(3)    . . . . yes

 C(12)     C(9)      P(1)      C(17)     135.0(2)   . . . . yes

 C(12)     C(9)      P(1)      C(19)     -117.5(3)  . . . . yes

 C(12)     C(9)      O(3)      C(14)     -174.3(5)  . . . . yes

 C(12)     C(9)      C(1)      C(15)     -172.6(2)  . . . . yes

 C(12)     C(9)      C(8)      C(13)     8.6(1)     . . . . yes

 C(12)     C(9)      C(8)      C(14)     9.0(3)     . . . . yes

 C(12)     C(9)      C(8)      C(16)     -169.2(2)  . . . . yes

 C(12)     C(9)      C(11)     C(14)     6.1(4)     . . . . yes

 C(12)     C(9)      C(13)     C(14)     -171.6(3)  . . . . yes

 C(12)     C(9)      C(14)     C(13)     7.3(2)     . . . . yes

 C(12)     C(10)     C(5)      C(13)     2.5(5)     . . . . yes

 C(12)     C(10)     C(5)      C(14)     1.6(5)     . . . . yes

 C(12)     C(10)     C(11)     C(14)     174.7(3)   . . . . yes

 C(12)     C(10)     C(13)     C(14)     -0.1(5)    . . . . yes

 C(12)     C(10)     C(14)     C(13)     179.9(4)   . . . . yes

 C(12)     C(11)     O(1)      C(15)     -33.1(7)   . . . . yes

 C(12)     C(11)     O(3)      C(14)     -9.6(4)    . . . . yes

 C(12)     C(11)     C(1)      C(15)     -168.4(3)  . . . . yes

 C(12)     C(11)     C(9)      C(13)     -0.5(3)    . . . . yes

 C(12)     C(11)     C(9)      C(14)     -6.1(4)    . . . . yes

 C(12)     C(11)     C(10)     C(13)     -176.0(4)  . . . . yes

 C(12)     C(11)     C(10)     C(14)     -174.7(3)  . . . . yes

 C(12)     C(11)     C(14)     C(13)     3.9(2)     . . . . yes

 C(12)     C(13)     C(5)      C(14)     177.1(6)   . . . . yes

 C(12)     C(13)     C(8)      C(14)     -9.1(3)    . . . . yes

 C(12)     C(13)     C(8)      C(16)     38(3)      . . . . yes

 C(12)     C(13)     C(9)      C(14)     171.6(3)   . . . . yes

 C(12)     C(13)     C(10)     C(14)     0.1(5)     . . . . yes

 C(13)     C(5)      C(7)      C(14)     -2.9(2)    . . . . yes

 C(13)     C(5)      C(10)     C(14)     0.9(3)     . . . . yes

 C(13)     C(6)      C(5)      C(14)     1.7(3)     . . . . yes

 C(13)     C(6)      C(7)      C(14)     -3.4(2)    . . . . yes

 C(13)     C(6)      C(8)      C(14)     -4.5(2)    . . . . yes

 C(13)     C(6)      C(8)      C(16)     178.1(2)   . . . . yes

 C(13)     C(8)      O(2)      C(14)     -10.7(2)   . . . . yes

 C(13)     C(8)      O(2)      C(16)     177.6(3)   . . . . yes

 C(13)     C(8)      C(7)      C(14)     4.5(2)     . . . . yes

 C(13)     C(8)      C(9)      C(14)     -0.3(3)    . . . . yes

 C(13)     C(9)      P(1)      C(17)     -134.9(2)  . . . . yes

 C(13)     C(9)      P(1)      C(19)     -27.4(3)   . . . . yes

 C(13)     C(9)      O(3)      C(14)     -10.4(2)   . . . . yes

 C(13)     C(9)      C(1)      C(15)     -173.1(2)  . . . . yes

 C(13)     C(9)      C(8)      C(14)     0.3(3)     . . . . yes

 C(13)     C(9)      C(8)      C(16)     -177.8(2)  . . . . yes

 C(13)     C(9)      C(11)     C(14)     5.5(2)     . . . . yes

 C(13)     C(10)     C(5)      C(14)     -0.9(3)    . . . . yes

 C(13)     C(10)     C(11)     C(14)     -1.4(2)    . . . . yes

 C(13)     C(12)     C(1)      C(15)     75(1)      . . . . yes

 C(13)     C(12)     C(9)      C(14)     -4.4(1)    . . . . yes

 C(13)     C(12)     C(10)     C(14)     -0.1(2)    . . . . yes

 C(13)     C(12)     C(11)     C(14)     -2.3(1)    . . . . yes

 C(13)     C(14)     O(2)      C(16)     34.6(7)    . . . . yes

 C(13)     C(14)     C(8)      C(16)     -176.5(3)  . . . . yes

 C(14)     O(2)      C(8)      C(16)     171.7(3)   . . . . yes

 C(14)     O(3)      P(1)      C(17)     -146.3(2)  . . . . yes

 C(14)     O(3)      P(1)      C(19)     -61.6(3)   . . . . yes

 C(14)     O(3)      O(1)      C(15)     -158.0(4)  . . . . yes

 C(14)     O(3)      O(2)      C(16)     153.0(5)   . . . . yes

 C(14)     O(3)      O(5)      C(17)     -109.5(4)  . . . . yes

 C(14)     O(3)      O(5)      C(18)     -144.5(3)  . . . . yes

 C(14)     O(3)      O(6)      C(19)     137(1)     . . . . yes

 C(14)     O(3)      O(6)      C(20)     -89.0(6)   . . . . yes

 C(14)     C(7)      O(2)      C(16)     -171.9(2)  . . . . yes

 C(14)     C(7)      C(8)      C(16)     -177.2(3)  . . . . yes

 C(14)     C(8)      O(2)      C(16)     -171.7(3)  . . . . yes

 C(14)     C(9)      P(1)      C(17)     -101.8(2)  . . . . yes

 C(14)     C(9)      P(1)      C(19)     5.7(3)     . . . . yes

 C(14)     C(9)      C(1)      C(15)     177.3(4)   . . . . yes

 C(14)     C(9)      C(8)      C(16)     -178.1(4)  . . . . yes

 C(14)     C(11)     O(1)      C(15)     153.8(5)   . . . . yes

 C(14)     C(11)     C(1)      C(15)     17.5(7)    . . . . yes

 C(14)     C(13)     C(8)      C(16)     48(3)      . . . . yes

 C(17)     P(1)      O(5)      C(18)     -38.8(4)   . . . . yes

 C(17)     P(1)      O(6)      C(19)     -90.7(4)   . . . . yes

 C(17)     P(1)      O(6)      C(20)     -68.1(5)   . . . . yes

 C(17)     P(1)      C(19)     C(20)     60.9(7)    . . . . yes

 C(17)     O(5)      P(1)      C(19)     -75.8(4)   . . . . yes

 C(17)     O(5)      O(6)      C(19)     -96.4(4)   . . . . yes

 C(17)     O(5)      O(6)      C(20)     -63.6(3)   . . . . yes

 C(18)     O(5)      P(1)      C(19)     -114.7(4)  . . . . yes

 C(18)     O(5)      O(6)      C(19)     -103.7(4)  . . . . yes

 C(18)     O(5)      O(6)      C(20)     -70.9(3)   . . . . yes

 C(18)     C(17)     P(1)      C(19)     153.5(5)   . . . . yes

 C(19)     P(1)      O(6)      C(20)     22.6(5)    . . . . yes

 C(19)     P(1)      O(6)      C(20)     22.6(5)    . . . . yes

#------------------------------------------------------------------------------

loop_

_geom_contact_atom_site_label_1

_geom_contact_atom_site_label_2

_geom_contact_distance

_geom_contact_site_symmetry_1

_geom_contact_site_symmetry_2

_geom_contact_publ_flag

 P(1)      C(9)      2.611(3)   . . ?

 P(1)      C(17)     2.646(4)   . . ?

 P(1)      C(19)     2.616(4)   . . ?

 O(1)      O(3)      2.574(3)   . . ?

 O(2)      O(3)      2.561(3)   . . ?

 O(3)      O(4)      2.584(3)   . . ?

 O(4)      O(6)      2.562(3)   . . ?

 C(1)      C(9)      2.538(4)   . . ?

 C(8)      C(9)      2.526(4)   . . ?

 O(2)      C(3)      3.518(4)   . 4_556 ?

 O(3)      C(4)      3.457(4)   . 4_556 ?

 O(4)      C(15)     3.470(5)   . 3_556 ?

 O(4)      C(16)     3.509(6)   . 4_646 ?

 O(4)      C(5)      3.554(4)   . 2_554 ?

 O(5)      C(15)     3.505(5)   . 3_556 ?

 C(5)      C(16)     3.241(5)   . 3_457 ?

 C(10)     C(20)     3.591(6)   . 4_646 ?

#------------------------------------------------------------------------------

#------------------------------------------------------------------------------

#===END
